1  
2  
3  
4  
5  
6  
7  
8  
9  
10  
11  
12  
13  
14  
15  
16  
17  
18  
19  
20  
21  
22  
23  
24  
25  
26  
27  
28  
29  
30  
31

# **A novel locally c-di-GMP-controlled exopolysaccharide synthase required for N4 phage infection of *E. coli***

**Eike H. Junkermeier and Regine Hengge\***

Institut für Biologie / Mikrobiologie, Humboldt-Universität zu Berlin, 10115 Berlin,  
Germany

Running Head:

Local c-di-GMP signaling in the control of NfrB

Key words:

nucleotide second messenger, c-di-GMP, diguanylate cyclase, DgcJ, glycosyltransferase,  
enterobacterial common antigen, ManNAc, bacteriophage N4, biofilm

\* Corresponding author:

Mailing address: Institut für Biologie / Mikrobiologie, Humboldt-Universität zu Berlin,  
Philippstr. 13 – Haus 22, 10115 Berlin, Germany; Tel: (49)-30-2093-49686; Fax: (49)-30-  
2093-49682; e-mail: [regine.hengge@hu-berlin.de](mailto:regine.hengge@hu-berlin.de)

31 **Abstract**

32

33 A major target of c-di-GMP signaling is the production of biofilm-associated extracellular  
34 polymeric substances (EPS), which in *Escherichia coli* K-12 include amyloid curli fibres,  
35 phosphoethanolamine-modified (pEtN-)cellulose and poly-N-acetyl-glucosamine (PGA).  
36 However, the characterized c-di-GMP-binding effector systems are largely outnumbered by  
37 the 12 diguanylate cyclases (DGCs) and 13 phosphodiesterases (PDEs), which synthesize and  
38 degrade c-di-GMP, respectively. *E. coli* possesses a single protein with a potentially c-di-  
39 GMP-binding MshEN domain, NfrB, which – together with the outer membrane protein NfrA  
40 – is known to serve as a receptor system for phage N4. Here, we show that NfrB not only  
41 binds c-di-GMP with high affinity, but as a novel c-di-GMP-controlled glycosyltransferase  
42 synthesizes a secreted EPS, which can impede motility and is required as an initial receptor  
43 for phage N4 infection. In addition, a systematic screening of the 12 DGCs of *E. coli* K-12  
44 revealed that specifically DgcJ is required for the infection with phage N4 and interacts  
45 directly with NfrB. This is in line with local signaling models, where specific DGCs and/or  
46 PDEs form protein complexes with particular c-di-GMP effector/target systems. Our findings  
47 thus provide further evidence that intracellular signaling pathways, which all use the same  
48 diffusible second messenger, can act in parallel in a highly specific manner.

49

50 **Importance**

51 Key findings in model organisms led to the concept of ‘local’ signaling, challenging the  
52 dogma of a gradually increasing global intracellular c-di-GMP concentration driving the  
53 motile-sessile transition in bacteria. In our current model, bacteria dynamically combine  
54 global as well as local signaling modes, in which specific DGCs and/or PDEs team up with  
55 effector/target systems in multiprotein complexes. Our present study highlights a novel  
56 example of how specificity in c-di-GMP signaling can be achieved by showing NfrB as a  
57 novel c-di-GMP binding effector in *E. coli*, which is controlled in a local manner specifically  
58 by DgcJ. We further show that NfrB (which was initially found as a part of a receptor system  
59 for phage N4) is involved in the production of a novel exopolysaccharide. Finally, our data  
60 shine new light on host interaction of phage N4, which uses this exopolysaccharide as an  
61 initial receptor for adsorption.

62

## 62 **Introduction**

63  
64 Many key cellular functions in bacteria, ranging from adhesion and biofilm formation to  
65 development and virulence, are controlled by the second messenger bis-(3',5')-cyclic-di-  
66 guanosine-monophosphate (c-di-GMP) (12). Remarkably, the genomes of most bacteria  
67 encode a multitude of diguanylate cyclases (DGCs) and phosphodiesterases (PDEs) that  
68 synthesize and degrade c-di-GMP, respectively (39). In *Escherichia coli* K-12, most of its 12  
69 DGCs and 13 PDEs are not just expressed, but also active at the same time (11, 42, 47). This  
70 multiplicity raised the question of how c-di-GMP signaling can be specific, as all of the c-di-  
71 GMP-controlled effector/target systems rely on the same diffusible intracellular second  
72 messenger (9). Moreover, knockout mutations in particular single DGCs or PDEs were found  
73 to result in strong phenotypes without affecting the strikingly low intracellular c-di-GMP  
74 level in *E. coli*, which does not exceed 100 nM even in stationary phase cells, i.e. when the  
75 characterized effector/target systems are clearly active (42). These seemingly enigmatic  
76 observations could be resolved by a model of 'local signaling', in which a master PDE  
77 (PdeH) maintains a very low global c-di-GMP pool, while specific DGCs, which are directly  
78 and locally associated with specific effector/target systems, can act as local and dynamic c-di-  
79 GMP sources to trigger specific responses. Similarly, specific PDEs associated with  
80 effector/target systems can act as local sinks of c-di-GMP and thus inhibit the regulatory  
81 output (recently reviewed in (8)).

82 Prototypical examples of such locally c-di-GMP-controlled systems have been examined  
83 thoroughly in *E. coli*. For example, cellulose synthesis, modification and secretion by the Bcs  
84 machinery is not only c-di-GMP-controlled (27, 49), but depends specifically on the  
85 diguanylate cyclase DgcC (YaiC) (2). By being directly localized to the core BcsAB complex  
86 via protein-protein interactions, DgcC and PdeK serve as a source and sink of c-di-GMP,  
87 respectively, for the c-di-GMP-binding PilZ-domain of the cellulose synthase subunit BcsA  
88 (36). In this example, the main function of the protein-protein interactions is to co-localize the  
89 source and sink of c-di-GMP to its receptor binding site. In addition, protein-protein  
90 interactions between specific DGCs/PDEs and their respective effector/target systems can  
91 also assume regulatory functions. Thus, the expression of the biofilm regulator CsgD is  
92 controlled by the locally acting DgcE-PdeR-DgcM-MlrA signaling module. In this system,  
93 the 'trigger PDE' PdeR directly binds and thereby inhibits DgcM and the transcription factor  
94 MlrA. When PdeR becomes active as a PDE, i.e. degrades c-di-GMP that is provided  
95 specifically by DgcE, this direct inhibition is released with two consequences: DgcM can

96 produce c-di-GMP, which results in a local positive feedback, and the transcription of *csgD* is  
97 initiated by the DgcM-MlrA complex (10, 22, 44).

98 Apart from these characterized systems, the considerable number of 12 DGCs and 13  
99 PDEs of *E. coli* K-12 – most of still unknown function – suggests the existence of additional  
100 c-di-GMP-controlled systems. In recent years, various approaches have led to the discovery of  
101 novel types of c-di-GMP-binding effector components in other bacteria. Among those, the N-  
102 terminal domain of MshE-type ATPases (termed MshEN domain), which are involved in  
103 Type IV pilus formation of *Vibrio cholerae* as well as bacterial Type II secretion systems of  
104 *Pseudomonas aeruginosa* (13, 37), has been identified as a potent c-di-GMP binding receptor.  
105 The MshEN domain binds c-di-GMP in a unique fashion, in which a tandem array of two  
106 highly conserved 24-residue motifs (Fig. 1A) undergoes extensive hydrophobic interactions  
107 with the dinucleotide (50). Bioinformatic studies revealed that the MshEN domain is a  
108 ubiquitous regulatory domain. Apart from being present in ATPases of type II and type IV  
109 secretion systems, it also seems to be involved in a variety of other bacterial processes,  
110 including two-component signaling, protein phosphorylation, polysaccharide secretion and  
111 chemotaxis (3, 50). However, the large majority of these proteins have remained  
112 uncharacterized.

113 NfrB is the only protein containing the MshEN domain in *E. coli*. More than 30 years ago,  
114 NfrB was found to be part of a receptor system for bacteriophage N4, even though it is  
115 located in the inner membrane (16, 17). In addition, phage N4 infection requires the outer  
116 membrane protein NfrA, which is directly bound by the phage protein gp65 (16, 17, 23).  
117 Moreover, the cytoplasmic protein NfrC (WecB), which also plays a role in the biosynthesis  
118 of the enterobacterial common antigen (ECA) has been implicated in phage N4 infection (15,  
119 24).

120 Here, we show that *E. coli* NfrB is a c-di-GMP binding protein with a novel  
121 glycosyltransferase-MshEN domain architecture. We found that its ability to bind c-di-GMP  
122 as well as its glycosyltransferase active site are both essential for a successful N4 phage  
123 infection. We further provide evidence, that the NfrB-NfrA system produces a novel, yet  
124 uncharacterized exopolysaccharide, that not only serves an initial receptor for the phage N4  
125 but that can also impede flagellar activity. Furthermore, successful phage N4 infection is  
126 shown to specifically require DgcJ, which directly contacts NfrB by protein-protein  
127 interaction, thus establishing a novel locally c-di-GMP-controlled system in *E. coli*. Starting  
128 from a very different angle, i.e. phage N4 biology, and using mainly genetics, the  
129 accompanying paper came to conclusions that are fully consistent with ours (43).

130

## 131 **Results**

132

### 133 ***NfrB is a novel c-di-GMP-binding effector protein in E. coli***

134 Since the NfrB protein of *E. coli* K-12 is a larger protein with a fully conserved MshEN  
135 domain at its C-terminus (Fig. 1A), we started our study by an analysis of its overall domain  
136 structure as well as its genomic context. The N-terminal domain of NfrB shows similarity to  
137 family-2 glycosyltransferase (GT) and indeed features the conserved DxD, TED and QxxRW  
138 active site signature of processive GTs (20) (Fig. 1A). The two domains of NfrB are linked by  
139 two putative transmembrane helices, which most likely anchor NfrB in the inner membrane  
140 (Fig. S1A). In *E. coli*, *nfrB* is encoded in an operon with *nfrA* and *ybcH* (Fig. 1B). A closer  
141 inspection of the NfrA protein sequence revealed that NfrA has a classical signal sequence,  
142 TPR-rich repeats and a large C-terminal region that most probably forms an outer membrane  
143 pore (Fig. S1C). YbcH is a hydrophilic protein with a N-terminal signal sequence-like region  
144 that lacks a cleavage site for signal peptidase, i.e. YbcH seems a periplasmic protein, which  
145 stays anchored in the inner membrane (Fig. S1F). Taken together, the three proteins NfrB,  
146 NfrA and YbcH show the key characteristics of a putative Gram-negative exopolysaccharide  
147 synthesis and secretion system, i.e. an inner membrane-located polysaccharide synthase  
148 (NfrB), a periplasmic putative scaffold protein (YbcH) as well as an outer membrane TPR-  
149 containing  $\beta$ -barrel protein (NfrA).

150 Other exopolysaccharide synthesis systems, e.g. cellulose synthase or PGA synthase, are  
151 commonly activated by c-di-GMP. NfrB, however, seems the glycosyltransferase, which  
152 contains a MshEN domain as a potential c-di-GMP binding domain. Therefore, we purified  
153 the soluble MshEN domain of NfrB (NfrB<sup>414-745</sup>) and tested whether it binds c-di-GMP in a  
154 radial capillary action of ligand assay (DRaCALA). Specific interaction was indeed observed  
155 (Fig. 1C), which was specifically outcompeted by excess unlabeled c-di-GMP, but not by any  
156 of the other nucleotides tested (Fig. 1C). To determine the binding affinity, we performed  
157 microscale thermophoresis (MST) experiments, which not only confirmed c-di-GMP binding  
158 of NfrB<sup>414-745</sup> but also revealed a  $K_d$  of  $1.0 \pm 0.35 \mu\text{M}$  (Fig. 1D).

159

### 160 ***The nfrBA-ybcH operon is post-exponentially expressed, temperature-controlled and co-*** 161 ***regulated with flagella***

162 To gain insights into the physiological function of NfrB in *E. coli*, we investigated *nfrB*  
163 expression and regulation in *E. coli*. We generated a single copy *nfrB::lacZ* reporter gene

164 fusion, which reflects the promoter activity of *nfrB* (and thus of the entire *nfrBA-ybcH*  
165 operon) and monitored its expression during the growth cycle of *E. coli* in liquid LB medium.  
166 Overall, *nfrB::lacZ* was expressed at relatively low levels in wild-type cells (Fig. 2A).  
167 Expression increased during late exponential phase and again noticeably declined during  
168 entry into stationary phase. This pattern was similar, but expression levels were  
169 approximately twofold higher at 37°C than at 28°C (Fig. 2A). The decreasing expression of  
170 the *nfrB::lacZ* reporter fusion during early stationary phase suggested a negative regulation  
171 by the general stress and stationary phase sigma factor RpoS ( $\sigma^S$ ). Indeed, expression of  
172 *nfrB::lacZ* remained higher in stationary phase in a *rpoS* mutant background (Fig. 2B).

173 This transiently increased expression in the late or post-exponential phase is a pattern that  
174 is typically found for genes that are regulated by the flagellar control cascade, which involves  
175 the flagellar master regulator FlhDC and the flagellar sigma factor FliA ( $\sigma^{28}$ ). Knocking out  
176 either FlhDC or FliA indeed reduced the expression of the *nfrB::lacZ* reporter gene fusion  
177 (Fig. 2B). Yet, the absence of FliA also leads to increased intracellular c-di-GMP level (42),  
178 since *pdeH*, which encodes the master PDE in *E. coli*, is a FliA-dependent flagellar class 3  
179 gene (6). Therefore, we wanted to rule out the possibility, that c-di-GMP somehow controls  
180 the expression of *nfrB*. However, the loss of *pdeH* had no effect on the expression of  
181 *nfrB::lacZ* (Fig. 2B). Thus, our data indicate that the *nfrBA-ybcH* operon belongs to the group  
182 of flagellar class 3 genes.

183 In addition, we determined cellular protein levels of NfrB by immunoblot analysis. For this  
184 purpose, we inserted a FLAG-tag-encoding sequence close to the 3' end of *nfrB* in the  
185 chromosome. The 3xFLAG-tagged variant of NfrB (NfrB<sup>FLAG</sup>) possesses the tag epitope  
186 between A736 and Q737, to avoid any polar effects on the translation initiation of NfrA, as  
187 the coding sequences of both genes overlap by 14 basepairs (Fig. 1B). NfrB<sup>FLAG</sup> showed  
188 increasing abundance during postexponential growth of *E. coli*, whereas levels declined again  
189 during entry into stationary phase (Fig. 2B). In summary, these results show, that NfrB is  
190 predominantly expressed in *E. coli* during post-exponential growth in a FliA-activated  
191 manner.

192

### 193 ***Disruption of the nfr operon restores the motility defect of a $\Delta pdeH \Delta ycgR$ mutant***

194 The finding that the Nfr system is under control of the flagellar sigma factor FliA – a property  
195 that it shares with some other non-flagellar proteins related to c-di-GMP signaling such as  
196 PdeH and the PilZ domain protein YcgR – suggested a physiological and possibly regulatory  
197 connection between the Nfr system and bacterial motility. Therefore, we tested swimming

198 motility of a  $\Delta nfrBA-ybcH$  mutant strain in semi-solid agar plates but observed no difference  
199 compared to the parental strain (Fig. 3A). The loss of the master PDE PdeH renders cells non-  
200 motile (6, 30, 40) (Fig. 3A), because the resulting strongly increased intracellular c-di-GMP  
201 level (42) activates YcgR, which in its c-di-GMP-bound form functions as a flagellar brake by  
202 directly interacting with the flagellar basal body (1, 5). However, knocking out YcgR only  
203 partially suppresses this motility defect of a *pdeH* mutant (6), indicating, that an additional  
204 factor restrains bacterial motility in the *pdeH ycgR* background. This factor seems to be the  
205 Nfr system, since deleting also the *nfrBA-ybcH* operon in addition to *pdeH* and *ycgR* restored  
206 wildtype motility (Fig. 3A). Similarly, also single gene disruptions of *nfrB* or *nfrA* could  
207 restore full motility of a *pdeH ycgR* mutant (Fig. 3B). Interestingly, however, deleting *ybcH*  
208 only partially suppressed the *pdeH ycgR* motility defect (Fig. 3B), suggesting a non-essential  
209 role for YbcH in the function of the Nfr system. We conclude that under conditions of  
210 increased intracellular c-di-GMP levels (probably required to activate NfrB), the Nfr system  
211 can interfere with bacterial motility, most likely by synthesizing and secreting a yet unknown  
212 exopolysaccharide.

213 Based on this hypothesis, we reasoned that also a change in substrate availability for the  
214 glycosyltransferase activity of NfrB might affect the motility phenotype. For this reason, we  
215 further investigated the role of NfrC (WecB), which is also required for phage N4 infection  
216 (15) and which was shown to be an epimerase in the production of UDP-N-acetyl-  
217 mannosamine (UDP-ManNAc), a precursor for the enterobacterial common antigen (ECA)  
218 (24, 34, 41). Indeed, deletion of either the entire *wec* operon (*wecA-G*, encoding all the  
219 enzymes required for the biosynthesis of the ECA) or of *nfrC* (*wecB*) alone also showed a  
220 moderate suppression of the *pdeH ycgR* phenotype (Fig. 3B). This finding suggests that NfrB  
221 uses the product of NfrC (WecB), i.e. UDP-ManNAc, as a substrate for the synthesis of an  
222 exopolysaccharide. Interestingly, disrupting *wecC* – the gene next to *wecB* in the *wecA-G*  
223 operon – had the opposite effect, i.e. caused an even greater motility defect of the *pdeH ycgR*  
224 mutant background (Fig. 3B). Since ECA synthesis is defective in a *wecC* mutant, more UDP-  
225 ManNAc produced by the intact NfrC (WecB) in this strain would be available for the  
226 synthesis of the exopolysaccharide produced by NfrC.

227

### 228 ***Infection of E. coli with bacteriophage N4 requires the activity of the glycosyltransferase*** 229 ***domain of NfrB***

230 NfrA, NfrB and NfrC (WecB) have been implicated in the infection of *E. coli* with phage N4  
231 (15, 17). Based on the results described above, we were inspired to gain further insights into

232 the molecular function of the Nfr system by revisiting its role in phage N4 infection. We first  
233 analyzed the ability of phage N4 to lyse different derivatives of *E. coli* K-12 W3110 using  
234 spot assays. As expected, phage N4 was not able to lyse *E. coli* mutant devoid of NfrB or  
235 NfrA, whereas YbcH was dispensable for successful phage infection (Fig. 4A). In addition, a  
236 knockout of the biosynthetic pathway of ECA ( $\Delta wecA-G$ ) as well as a single gene disruption  
237 of *nfrC* (*wecB*) showed a phage N4 plating defect. Remarkably, knocking out WecC, which  
238 also results in the absence of ECA, did not change the efficiency of plating of phage N4,  
239 indicating that the only contribution of the ECA system to phage N4 infection is the UDP-  
240 ManNAc produced by NfrC (WecB). This in turn suggests that the exopolysaccharide  
241 produced by NfrB – and not only the NfrA and NfrB proteins *per se* – are involved in phage  
242 infection.

243 In order to further dissect the roles of the glycosyltransferase (GT) und MshEN domains of  
244 NfrB in phage N4 infection, the *nfrBA-ybcH* operon was cloned onto a low copy number  
245 plasmid vector (pAP58), with the *tac* promotor ( $p_{tac}$ ) driving its expression. No inducer  
246 (IPTG) was added to the media in order to obtain just moderate (leaky) expression from  $p_{tac}$  in  
247 our experiments, since the *nfr* operon is expressed at low levels from the chromosome. In  
248 addition, we introduced mutations in highly conserved residues of NfrB that are crucial (i) for  
249 the glycosyltransferase activity (D169A, D267A and W330A) (20), and (ii) for c-di-GMP  
250 binding in the MshEN domain (L490A, L490/537A and G491L) (50). None of these  
251 mutations affected the cellular levels of NfrB (Fig. S2). When introduced into a  $\Delta nfrBA-ybcH$   
252 mutant strain, the wild-type construct restored the plating efficiency of phage N4 (Fig. 4B).  
253 However, the variants lacking the active sites amino acids of the glycosyltransferase domain  
254 of NfrB failed to complement the phage N4 plating defect (Fig 4B). Variants with single  
255 (L490A) as well as double (L490/537A) amino acid substitutions in the MshEN domain  
256 showed a moderate, but additive reduction in the N4 plaque forming efficiency, whereas the  
257 mutation of G491 in the MshEN domain led to the most profound reduction in the N4 plating  
258 efficiency (Fig. 4B). Together, these results show, that phage N4 does not only use NfrB and  
259 NfrA proteins as the host receptors for infection, but requires both the glycosyltransferase  
260 activity of NfrB and its ability to bind c-di-GMP. This indicates that binding of c-di-GMP to  
261 the MshEN domain of NfrB allosterically activates its GT domain. This conclusion is in line  
262 with the finding reported above, that a mutation specifically in *nfrC* (*wecB*), which eliminates  
263 the synthesis of the putative substrate of the GT domain, i.e. UDP-ManNAc, confers  
264 resistance to phage N4 infection.

265



266 ***Specifically DgcJ is required for NfrBA-dependent phage N4 infection and directly***  
267 ***interacts with NfrB***

268 One criterium to identify local c-di-GMP signaling is the observation that knocking out  
269 distinct DGCs or PDEs leads to highly specific phenotypes (8). Our finding, that the loss of  
270 the ability of NfrB to bind of c-di-GMP conferred resistance against the infection with phage  
271 N4 (Fig. 4B), raised the question, whether a specific DGC could be required for successful  
272 phage infection. Therefore, all the single knockout mutants lacking the 12 active DGCs of *E.*  
273 *coli* K-12 were screened for a phage N4 plating defect (Fig. 5A). In fact, a *dgcJ* deletion  
274 showed a severe plating defect, while a *dgcQ* deletion marginally reduced plating efficiency  
275 by one order of magnitude. Notably, the *dgcJ dgcQ* double knockout mutant did not show any  
276 detectable plaque formation of phage N4 (Fig. 5A). Thus, NfrB seems specifically activated  
277 by DgcJ, with DgcQ providing for a minor backup.

278 Next, we focused on the role of DgcJ in phage N4 infection. Therefore, the *dgcJ* gene was  
279 cloned on a medium copy number plasmid (pRH800), with  $p_{tac}$  driving its expression. No  
280 inducer (IPTG) was added to the media in order to not drastically overproduce DgcJ. In  
281 addition, we constructed a derivative with active site (A-site) mutations (DgcJ<sup>GGAAF</sup>), to  
282 eliminate the DGC activity of the GGDEF domain of DgcJ. When introduced into the *dgcJ*  
283 deletion mutant, wild-type DgcJ was able to complement the phage N4 plating defect,  
284 whereas DgcJ<sup>GGAAF</sup> failed to do so (Fig. 5B). These data show, that the N4 infection does not  
285 simply require the presence of the inner membrane protein DgcJ, but more specifically the  
286 production of c-di-GMP by DgcJ. Therefore, DgcJ is involved in a highly specific c-di-GMP-  
287 mediated activation of NfrB.

288 Specific signaling of a distinct DGC (or PDE) to a particular effector/target system can be  
289 expected to occur via a direct protein-protein interaction (8). To test for such interaction, we  
290 added a C-terminal 6xHis tag to DgcJ (DgcJ<sup>His</sup>) expressed from pRH800. In parallel, a similar  
291 construct on the same vector was obtained with DgcQ (DgcQ<sup>His</sup>), which had shown a minor  
292 backup activation of NfrB (Fig. 5A). The coding sequence for NfrB<sup>FLAG</sup> was cloned together  
293 with *nfrA* and *ybcH* on the compatible low-copy number vector pAP58, which allows co-  
294 transformation and co-expression of NfrB<sup>FLAG</sup> and DgcJ<sup>His</sup> (or DgcQ<sup>His</sup>). All of these proteins  
295 were expressed and, when co-expressed, did not affect each others level of expression (Fig.  
296 S3). This allowed affinity chromatography or ‘pulldown’ experiments, where DgcJ<sup>His</sup> or  
297 DgcQ<sup>His</sup> are bound and eluted from a nickel-charged affinity (Ni-NTA) resin (Fig. 3C). When  
298 NfrB<sup>FLAG</sup> was co-expressed with DgcJ<sup>His</sup>, it indeed co-eluted with DgcJ<sup>His</sup> (Fig 3C). This

299 NfrB<sup>FLAG</sup>/DgcJ<sup>His</sup> interaction was highly specific, since NfrB<sup>FLAG</sup> alone was not retained by  
300 the Ni-NTA resin and did not co-purify with DgcQ<sup>His</sup> (Fig. 3C).

301 In conclusion, among all DGCs of *E. coli*, it is specifically DgcJ that is required for NfrB-  
302 dependent infection with phage N4. This role of DgcJ involves its ability to synthesize c-di-  
303 GMP. The activation of NfrB by this locally produced c-di-GMP is supported by the direct  
304 and specific protein-protein interaction between NfrB and DgcJ.

305

306 ***NfrB is locally and specifically activated by DgcJ even though DgcQ and DgcE are active***  
307 ***in parallel***

308 In principle, our finding that the activation of NfrB depends specifically on the diguanylate  
309 cyclase activity of DgcJ would also be compatible with the possibility, that DgcJ may be the  
310 only active DGC under the conditions tested (i.e., that the contribution of other DGCs to the  
311 global intracellular concentration of c-di-GMP might be negligible). Hence, we addressed the  
312 question, whether other DGCs are active during vegetative growth at 37 °C and thus drive up  
313 c-di-GMP levels in the *pdeH* mutant, which – via YcgR – interferes with motility.

314 To test this, we examined whether eliminating other DGCs could suppress the *pdeH*  
315 motility defect. When knocked out alone, only the *dgcJ* deletion could relieve the motility  
316 defect of the *pdeH* mutant to some extent, whereas deleting either *dgcQ* or *dgcE* had no effect  
317 (Fig. 6). However, when, in addition to *dgcJ*, also *dgcQ* or *dgcE* were knocked out, additive  
318 effects were observed. Eliminating DgcJ, DgcQ and DgcE all together fully restored the  
319 motility of the *pdeH* mutant (Fig. 6). These results indicate, that in vegetatively growing cells  
320 at 37 °C, DgcJ, DgcQ and DgcE are all active and contribute to a global pool of c-di-GMP,  
321 which in the absence of the master PDE PdeH becomes high enough to inhibit motility via  
322 YcgR. However, under conditions where PdeH is present to constantly drain the cellular c-di-  
323 GMP pool (42), which allows for motility as YcgR is not activated, it is only DgcJ, which can  
324 specifically activate NfrB by direct interaction (Fig. 5C) and thereby allow phage N4  
325 infection.

326

327 ***Phylogenetic analysis of the NfrBA-YbcH system shows its frequent genetic linkage to***  
328 ***NfrC (WecB)-like enzymes and DGCs***

329 Finally, we analyzed the phylogenetic distribution of NfrB homologs in various bacterial  
330 clades with a special focus on the genomic neighbourhoods of the respective genes using  
331 TBLASTN searches. 1841 *EcNfrB* homologs, of which 1101 (60 %) were encoded in  
332 different *Escherichia coli* strains, while the remaining ones were present in 406 taxonomically

333 different bacterial species (Fig. 7A). *EcNfrB* homologs can be found predominantly in  $\gamma$ - and  
334  $\beta$ -proteobacteria, but occasionally also occur in  $\alpha$ -proteobacteria and the  $\delta/\epsilon$ -subdivisions of  
335 proteobacteria. All of the identified homologs showed the conserved DxD, TED and QxxRW  
336 active site motif in the GT domain (Fig. 7C) and the large majority of 1705 homologs also  
337 featured a conserved MshEN domain.

338 Strikingly, in all organisms identified, which do not encode at least one *NfrC* (*WecB*)  
339 homolog (i.e. the UDP-N-acetylglucosamine 2-epimerase) in a different biosynthetic pathway  
340 (such as the ECA pathway in *E. coli*), a gene encoding a *NfrC* (*WecB*) homolog can be found  
341 directly associated with the respective *NfrB* coding sequence (for example in *Pseudomonas*  
342 *putida* BIRD-1 GCA\_0000183645.1) (Fig. 7B). Moreover, in most pseudomonads, as  
343 exemplified by *Pseudomonas soli* SJ10 (GCA\_000498975.2), a GGDEF domain protein, i.e.  
344 a putative DGC, can be found associated with the *nfr* operon (Fig. 7B). In some cases, e.g. in  
345 *Simplicispira suum* (GCA\_003008595.1), we identified an additional cluster of genes  
346 integrated into the *nfr* gene cluster, which seems related to the acetyltransferase complex that  
347 modifies the exopolysaccharide alginate in *Pseudomonas aeruginosa* (26). In rare cases, *NfrB*  
348 homologs can also be found in Gram-positive bacteria like *Eggerthella lenta* DSM 2243  
349 (GCA\_000024265.1), which evidently lacks the outer membrane pore (*NfrA*).

350 Taken together, our analysis of the local genomic associations of genes encoding *NfrB*  
351 homologs provides further evidence, that the system uses UDP-ManNAc as a substrate to  
352 produce an exopolysaccharide. In some cases, this exopolysaccharide may be even modified  
353 by an acetyltransferase machinery. The presence of a putative DGC gene immediately  
354 downstream, i.e. potentially as a fourth gene in a full *nfrBA-ybcH* operon in some  
355 *Pseudomonas* ssp. suggests a specific role of the respective DGC for the *Nfr* system in these  
356 bacteria.

357

## 358 Discussion

359

### 360 *NfrB* is a novel c-di-GMP-binding effector component locally controlled by *DgcJ*

361 The highly conserved MshEN domain of *NfrB* (Fig. 1A) was a strong indication, that *NfrB*  
362 represents a novel c-di-GMP binding effector in *E. coli*. *NfrB* indeed binds c-GMP  
363 specifically (Fig. 1C) with a  $K_d$  of  $1 \pm 0.35 \mu\text{M}$  (Fig. 1D). Thus, *NfrB* has an affinity in the  
364 same range as that of other c-di-GMP effectors in *E. coli*, as exemplified by the  $K_d$ s of  $0.84$   
365  $\mu\text{M}$  for *YcgR* (40) or  $8.2 \mu\text{M}$  for *BcsA* (33). Due to the activity of the strongly expressed  
366 ‘master’ PDE *PdeH*, *E. coli* maintains remarkably low intracellular c-di-GMP levels, ranging

367 from as low as 40-50 nM in vegetatively growing cells (OD<sub>578nm</sub> of 1) to approximately 80-  
368 100 nM during the transition into stationary phase (OD<sub>578nm</sub> of 3) (42). With a  $K_d$  that is at  
369 least 10-fold higher, NfrB should thus mainly be in the c-di-GMP-free (hence inactive) state  
370 under these conditions – if it responds just to the global intracellular c-di-GMP concentration.  
371 However, the finding that NfrB is active under these conditions – as demonstrated by the  
372 ability of phage N4 to infect *E. coli* in a Nfr-dependent manner (Fig. 4) – suggests local  
373 activation by c-di-GMP.

374 Such an active output of a c-di-GMP-controlled process at global cellular c-di-GMP levels  
375 severalfold below the  $K_d$  of the relevant c-di-GMP-binding effector is one of several criteria  
376 that should all be met to unequivocally establish a case of local c-di-GMP signaling (8).  
377 Another criterium consist in direct interactions between the specific DGG (and/or PDE) and  
378 effector/target component(s) in a signaling protein complex. Such physical vicinity increases  
379 the probability of c-di-GMP produced by the specific DGC to either hit the effector binding  
380 site or that of a co-localized PDE (8, 36). DgcJ and NfrB were indeed found to directly  
381 interact (Fig. 5C). The inability of an A-site point mutation in DgcJ (DgcJ<sup>GGAAF</sup>) to  
382 complement the  $\Delta dgcJ$  phenotype (Fig. 5B) indicates that DgcJ functions to provide c-di-  
383 GMP locally, so it has a high chance of hitting the MshEN domain of NfrB, resulting in the  
384 activation of its GT domain (Fig. 8). In other words, the direct interaction between DgcJ and  
385 NfrB plays a scaffolding role similar to DgcC serving BcsA (36), i.e. serves to establish close  
386 proximity, rather than also having a direct regulatory impact.

387 The third criterium for local c-di-GMP signaling are specific phenotypes of mutations that  
388 eliminate particular DGCs or PDEs, but not of mutations in other DGCs or PDEs that are  
389 concomitantly expressed and active (8). Also this criterium is met by the DgcJ/NfrB system,  
390 since the ability of phage N4 to infect *E. coli* in a NfrB-mediated manner strongly and  
391 specifically depends on the catalytic activity of DgcJ (Fig. 5A and B), even though DgcQ and  
392 DgcE are active under the same conditions (in cells growing at 37°C), as evidenced by the  
393 additive effects of all these three DGCs on motility in the absence of the master PDE PdeH  
394 (Fig. 6). These observations also confirm the previous insight that for c-di-GMP signaling to  
395 act locally, a high active and/or abundant master PDE like PdeH is required to maintain a very  
396 low global cellular c-di-GMP pool (42). Notably, the  $dgcQ$  mutation still had a slight effect  
397 on the plating efficiency of phage N4 (Fig. 4A). However, DgcQ did not co-elute with NfrB  
398 in our experiments (Fig. 5C), indicating that DgcQ is not as specifically involved in the  
399 control of NfrB as DgcJ. Yet, due to the common membrane location of DgcQ and NfrB,  
400 DgcQ-produced c-di-GMP may still have some probability to reach NfrB before it is

401 eliminated by PdeH. Based on all these criteria for local c-di-GMP signaling being met here,  
402 we therefore propose that DgcJ provides a local source of c-di-GMP right next to NfrB and  
403 thereby activates the Nfr system specifically even in the presence of additional active DGCs.

404 In parallel to our work, another study also reported that c-di-GMP is required for the  
405 infection with phage N4 (28). In good agreement with our data, it was found, that a *dgcJ*  
406 mutant showed stronger fitness in the presence of phage N4, whereas overexpression of six  
407 PDEs (PdeO, PdeR, PdeN, PdeL, PdeB, and PdeI) resulted in a resistance phenotype. That  
408 only six of the 13 PDEs of *E. coli* K-12 were able to confer a resistance phenotype, may be  
409 due to the remaining PDEs being catalytically inactive under the conditions tested or just not  
410 present in the Dub-seq library used (Mutalik et al. 2020). However, the finding that an ectopic  
411 expression of various PDEs increases resistance against phage N4 is in line with our proposed  
412 local signaling model for NfrB, since NfrB and DgcJ form a specific, yet open signaling  
413 module. This allows the DgcJ-produced c-di-GMP to either bind to the MshEN domain of  
414 NfrB or diffuse into the cytoplasm, where it gets degraded by PdeH. Expressing additional  
415 PDEs from a high copy number plasmid (as in (28)) strengthens the global sink for c-di-GMP  
416 in these cells, which will shift the binding equilibrium of NfrB to the c-di-GMP-free and  
417 therefore inactive state, which results in the reported phage N4 insensitivity.

418 Finally, the accompanying publication by Sellner et al. (43) shows that in particular PdeL  
419 overexpression confers complete phage N4 resistance. With its LuxR-EAL domain  
420 architecture, this ‘trigger PDE’ (10) acts a DNA-binding repressor, which down-regulates its  
421 own gene in manner that is allosterically controlled by its c-di-GMP binding and PDE activity  
422 (35). Thereby, PdeL does not only reduce the cellular c-di-GMP level in a positive feedback  
423 loop, but the new work shows that it also targets additional genes, including the *wec* operon,  
424 thereby preventing the expression of NfrC (WecB) (43). Thus, c-di-GMP plays a dual  
425 regulatory role in the production of the NfrB-synthesized polysaccharide by controlling *wec*  
426 operon transcription and thereby the production of the precursor UDP-ManNAc as well as the  
427 glycosyltransferase activity of NfrB.

428

429 ***The NfrBA system is post-exponentially induced, temperature-controlled, coregulated with***  
430 ***flagella and can impede motility***

431 The Nfr system is induced during the post-transcriptional phase of the growth cycle and is  
432 transcriptionally regulated by the flagellar control cascade consisting of FlhDC and the sigma  
433 factor FliA (Fig. 2B). In addition, it is more strongly expressed at 37°C than at 28°C (Fig.  
434 2A). A similar temperature regulation has also been described for *dgcJ* (previously termed

435 *yeaJ*) (47), which directly stimulates NfrB activity (see above). Overall, this regulatory  
436 pattern for the synthesis of the Nfr system and its exopolysaccharide product suggests a  
437 physiological function for the NfrB-synthesized exopolysaccharide that may be important  
438 within the human host, e.g. in providing protection against recognition by the immune system.  
439 Interestingly, lasting upregulation upon upshift to 37°C was recently observed also for other  
440 flagellar genes (14), suggesting that temperature input into the Nfr system is connected to its  
441 transcriptional regulation by the FlhDC-FliA cascade.

442 The Nfr systems shares its co-regulation with flagella with several other factors that are  
443 involved in c-di-GMP signaling in *E. coli*, i.e. the master PDE PdeH, the c-di-GMP-binding  
444 effector YcgR (6) and the GTPase system RdcA/RdcB that eventually – upon a decrease in  
445 cellular GTP – directly activates DgcE (31). The coregulation with PdeH is vital for a precise  
446 DgcJ-specific control of NfrB activity, since local c-di-GMP signaling depends on a low  
447 global c-di-GMP level being maintained by PdeH. On the other hand, YcgR, RdcA/RdcB and  
448 the Nfr system all share the ability to tune down motility in a c-di-GMP-controlled manner,  
449 albeit through different mechanisms. RdcA/RdcB-activated DgcE provides c-di-GMP that  
450 allows YcgR to operate as a c-di-GMP-activated brake, which binds to the flagellar basal  
451 body and thereby directly inhibits flagellar rotation from inside the cell (1, 5, 6, 30). By  
452 contrast, NfrB is a c-di-GMP-activated glycosyltransferase (Fig. 1) which produces an  
453 exopolysaccharide that gets secreted via the outer membrane  $\beta$ -barrel protein NfrA (Fig. 8).  
454 Along with YcgR, the Nfr system and therefore most likely its still uncharacterized  
455 exopolysaccharide reduce motility in a *pdeH* mutant (Fig. 3). Interestingly, this role of the Nfr  
456 system seems analogous to the ability of the exopolysaccharide cellulose to restrain motility  
457 of a *pdeH ycgR* mutant of *Salmonella* (52). Our BLAST searches revealed that *Salmonella*  
458 does not possess a NfrB homolog and the *E. coli* K-12 W3110 strain used in our motility  
459 assays does not produce cellulose (45). Thus, the Nfr-synthesized exopolysaccharide could  
460 restrain flagellar rotations by means of steric hindrance in a manner similar to that suggested  
461 for cellulose for *Salmonella* (52).

462

### 463 ***What kind of polysaccharide does NfrB produce?***

464 The observed effect on motility also correlated with the availability of cellular UDP-  
465 ManNAc, since a knockout mutation of *nfrC* (*wecB*) suppressed the motility defect, while it  
466 was enhanced by deleting *wecC* (Fig. 3B). Both gene products are enzymes involved in the  
467 production of the enterobacterial common antigen (ECA). NfrC (WecB) is a UDP-N-acetyl-  
468 glucosamine 2-epimerase responsible for the reversible epimerization between UDP-N-acetyl-

469 glucosamine (UDP-GlcNAc) and UDP-N-acetyl-mannosamine (UDP-ManNAc). WecC  
470 catalyzes the following step in the biosynthesis of ECA, in which UDP-N-acetyl-  
471 mannosaminuronic acid (UDP-ManNAcUA) is synthesized by a dehydrogenation of UDP-  
472 ManNAc. Thus, a *nfrC* (*wecB*) mutant lacks UDP-ManNAc, whereas a *wecC* mutant should  
473 have higher levels of UDP-ManNAc, since the next step in ECA synthesis is blocked. Based  
474 on the observation that (i) *nfrC* (*wecB*) and *wecC* mutations have opposite effects on the  
475 motility phenotype (Fig. 3C) and (ii) NfrC is required for phage N4 infection (Fig. 4A) (15),  
476 we propose that the GT domain of NfrB uses UDP-ManNAc as a substrate for the  
477 polymerization of a polysaccharide. In wild-type cells, NfrB has to compete with WecC for  
478 UDP-ManNAc. In a *wecC* mutant, however, higher UDP-ManNAc levels probably increase  
479 the rate of production and secretion of the NfrB-synthesized polysaccharide and thereby steric  
480 hindrance of flagellar rotation. That NfrB uses UDP-ManNAc as a substrate is also supported  
481 by our finding, that every bacterial species that we found to possess a NfrB homolog, but no  
482 NfrC (WecB) homolog associated with a separate biosynthetic pathway (such as the ECA  
483 pathway), shows direct genomic association of its respective *nfrB* and *nfrC* (*wecB*) coding  
484 sequences (Fig. 7).

485

#### 486 ***The NfrBA-produced polysaccharide serves as the primary receptor for phage N4***

487 The adsorption of tailed phages to their Gram-negative host surface is a stepwise process. It  
488 often includes an initial reversible binding of the phage to cell envelope structures, such as  
489 surface-exposed glycans or glycosylated structures. As a secondary step, host receptors in the  
490 outer membrane are irreversibly bound, which triggers tail contraction and ejection of the  
491 phage DNA into the bacterial cell (reviewed in (29)). Theoretically, phage N4 could bind to  
492 the ECA as its initial host receptor. However, in various N4 phage infection studies (16, 28)  
493 only mutations in *nfrC* (*wecB*) and none in the other genes of the ECA synthetic gene cluster  
494 were found arguing against a role of ECA in phage N4 infection. Our data indicate that the Nfr  
495 system most likely uses UDP-ManNAc – the enzymatic product of NfrC (WecB) – as a  
496 substrate for the production of an exopolysaccharide. Importantly, mutations in the  
497 glycosyltransferase domain of NfrB, as well as its c-di-GMP-binding MshEN domain were  
498 also found to generate a phage resistance phenotype (Fig. 4B). We therefore propose that  
499 phage N4 uses the NfrB-synthesized exopolysaccharide as its initial receptor (Fig. 8). Based  
500 on a similar conclusion, the accompanying study proposes NGR (N4 glycan receptor) as a  
501 name for this exopolysaccharide (43). Moreover, quite a low abundance of the Nfr system of  
502 three to five copies per cell was reported (16). Consequently, an initial binding to a secreted

503 polysaccharide and subsequent directional movement may be the most efficient way for phage  
504 N4 to reach its final host receptor NfrA. Its role as an initial phage receptor also suggests that  
505 the exopolysaccharide is not shed from the cells – which could turn it into a dead end trap for  
506 the phages – but remains surface-associated.

507

508

## 509 **Experimental procedures**

510

### 511 ***Bacterial strains and growth conditions***

512 The strains used in this study are derivatives of *E. coli* K-12 strain W3110 (7). C-terminally  
513 3xFLAG-tagged chromosomally encoded constructs of NfrB (NfrB<sup>FLAG</sup>) were generated by a  
514 two-step method similar to the one-step-inactivation protocol (4) as described before (18)  
515 using the oligonucleotides listed in Table S1. Knockout mutations in *nfrBA-ybcH*, *nfrB*, *nfrA*,  
516 *ybcH*, *wecA-G*, *wecB*, *wecC* are full open reading frame deletions or antibiotic resistance  
517 cassette insertions generated by one-step inactivation (4) using the oligonucleotides listed in  
518 Table S1. The mutations in all GGDEF/EAL domain-encoding genes as well as in *ycgR*,  
519 *pdeH*, *flhDC*, *fliA* and *rpoS* are full *orf* deletion/resistance cassette insertions generated in  
520 W3110 and were previously described (30, 42, 47, 51). When required, cassettes were  
521 removed as described in (4). P1 transduction (25) was used to transfer the mutations. *E. coli*  
522 strain BL21(DE3) (48) was used for protein purification experiments described below. Cells  
523 were grown in liquid LB medium under aeration at 28 or 37°C. Antibiotics were added as  
524 recommended. Liquid culture growth was followed as optical density at 578 nm (OD<sub>578nm</sub>).

525

### 526 ***Construction of the single copy lacZ reporter fusion***

527 The strain carrying the single copy *nfrB::lacZ* reporter fusion also carries a  $\Delta(lacI-A)::scar$   
528 deletion as previously described (42, 51). The primers used to construct the fusion are listed  
529 in Table S1. PCR fragments were cloned into the *lacZ* fusion vector pJL28, as previously  
530 described (51). The fusion was transferred to the att( $\lambda$ ) site of the chromosome via phage  
531  $\lambda$ RS45 (46). Single lysogeny was confirmed by PCR (32).

532

### 533 ***Bacteriophages and propagation***

534 Phage N4 (GCA\_000867865.1) was obtained from the Félix d'Hérelle Reference Center for  
535 Bacterial Viruses from the Université Laval (Quebec City, Canada). The phage was  
536 propagated on *E. coli* K-12 strains using lysis on plates according to standard protocols (19).



537 Phages were stored and diluted in SM buffer (100 mM NaCl, 8 mM MgSO<sub>4</sub>, 50 mM Tris-Cl)  
538 with 0.01 % (w/v) gelatine.

539

#### 540 ***Protein purification***

541 NfrB<sup>414-745</sup> was purified as a GST-tagged fusion protein. The coding sequence was cloned on  
542 plasmid pGEX-6P-1 (Cytiva 58-9546-48) using the primers listed in Table S1. *E. coli* BL21  
543 Gold strain was transformed with the plasmid and grown to an OD<sub>578nm</sub> of 0.6 in LB medium  
544 at 28 °C, when IPTG (0.1 mM) was added and incubation proceeded for additional 4 h. Cells  
545 were harvested and resuspended in lysis buffer (140 mM NaCl, 2.7 mM KCL, 10 mM  
546 Na<sub>2</sub>HPO<sub>4</sub> 1.8 mM KH<sub>2</sub>PO<sub>4</sub>, 5 mM DTT, pH = 7.3) containing protease inhibitor cocktail  
547 (complete, EDTA-free; Roche). Cells were disrupted by two passages through a French press.  
548 Insoluble material was removed by centrifugation. The supernatant was incubated under  
549 gentle shaking overnight with glutathione matrix (Qiagen; 1ml per 1000ml cell culture) at  
550 4°C. The resin was washed with cleavage buffer (50 mM Tris-Cl, 150 mM NaCl, 1 mM  
551 EDTA, 1mM DTT, pH = 7.0). PreScission<sup>TM</sup> protease (Cytiva 27-0843-01; 80 µl protease in  
552 920 µl binding buffer per bed volume) was added and incubated at 4 °C overnight to elute the  
553 protein.

554 Membrane-associated DgcJ<sup>His</sup> and DgcQ<sup>His</sup> were purified from IPTG-induced *E. coli* BL21  
555 Gold cells, transformed with pRH800-DgcJ<sup>His</sup> or pRH800-DgcQ<sup>His</sup>, respectively (pRH800 is a  
556 medium copy number p<sub>tac</sub> expression vector). Cells were harvested by centrifugation and  
557 resuspended in lysis buffer 50mM Tris (pH8.0), 10 mM MgCl<sub>2</sub> 300mM NaCl, 1mM EDTA  
558 and protease inhibitor cocktail (complete, EDTA-free; Roche). Cells were disrupted by two  
559 passages through a French press. Intact cells were removed by centrifugation for 20min at  
560 5000 rpm, total membranes were collected by ultra-centrifugation for 60 min at 36.000 rpm.  
561 The membrane pellet was solubilized in 50 mM Tris (pH8.0), 10 mM MgCl<sub>2</sub> 300 mM NaCl,  
562 5% glycerol, 2% dodecyl-β-d-maltoside (DDM; Roth) for 2h at 4°C. Solubilized and non-  
563 solubilized proteins were separated by ultra-centrifugation. The supernatant was incubated  
564 with Ni-NTA Agarose (QIAGEN) at 4°C. The resin was washed using solubilization buffer  
565 supplemented with 0.05% DDM. Proteins were eluted using solubilization buffer  
566 supplemented with 250 mM imidazole.

567

#### 568 ***Differential Radial Capillary Action of Ligand Assay (DRaCALA)***

569 DRaCALA assays were performed using 20 µM purified NfrB<sup>414-745</sup> incubated with 4 nM  
570 [<sup>32</sup>P]-c-di-GMP as described (38). Radiolabeled nucleotides were obtained from Hartmann

571 Analytic GmbH. Samples were spotted on nitrocellulose after 10 min incubation at room  
572 temperature.

573

#### 574 ***Microscale Thermophoresis***

575 NfrB<sup>414-745</sup> was labeled using the Protein Labeling Kit RED-NHS (NanoTemper  
576 Technologies). The labeling reaction was performed according to the manufacturer's  
577 instructions in the supplied labeling buffer applying a concentration of 20  $\mu$ M protein at room  
578 temperature for 30 min in the dark. Unreacted dye was removed with the supplied dye  
579 removal column equilibrated with MST buffer (137 mM NaCl, 2.7 mM KCl, 10 mM  
580 Na<sub>2</sub>HPO<sub>4</sub>, 1.8 mM KH<sub>2</sub>PO<sub>4</sub>, 0.05% Tween). The degree of labeling was determined using  
581 UV/VIS spectrophotometry at 650 and 280 nm. The labeled protein was adjusted to 80 nM  
582 with MST buffer. c-di-GMP and GTP was dissolved in MST buffer and a series of 16 1:2  
583 dilutions was prepared using the same buffer. For the measurement, each ligand dilution was  
584 mixed with one volume of labeled protein, which led to a final concentration of 40 nM and  
585 final ligand concentrations ranging from 0.00153  $\mu$ M to 50  $\mu$ M. After 10 min incubation, the  
586 samples were loaded into Monolith NT.115 Premium Capillaries (NanoTemper  
587 Technologies). MST was measured using a Monolith NT.115 instrument (NanoTemper  
588 Technologies) at an ambient temperature of 25°C. Instrument parameters were adjusted to 20  
589 % LED power and 40 % MST power. Data of three independently pipetted measurements  
590 were analyzed (MO.Affinity Analysis software version 2.3, NanoTemper Technologies).

591

#### 592 ***Determination of $\beta$ -galactosidase activity***

593  $\beta$ -Galactosidase activity was assayed by use of o-nitrophenol galactoside (ONPG) as a  
594 substrate and is reported as  $\mu$ mol o-nitrophenol  $\text{min}^{-1}$  (mg cellular protein)<sup>-1</sup> (25).  
595 Experiments were done at least twice, and a representative experiment is shown. OD<sub>578nm</sub> was  
596 determined and measurements were performed as with cells grown in liquid LB medium.

597

#### 598 ***Motility assay***

599 Bacterial motility was tested on swim plates containing 0.5 % bacto-tryptone, 0.5 % NaCl and  
600 0.3 % agar. A 3  $\mu$ l volume of overnight culture (OD adjusted) was inoculated into the swim  
601 plates and cells were allowed to grow and swim for 4.5 h at 37°C.

602

#### 603 ***SDS polyacrylamide gel electrophoresis and immunoblot detection***

604 Proteins were detected by SDS polyacrylamide gel electrophoresis (SDS-PAGE) and  
605 immunoblotting as previously described (21) using antibodies against the Flag epitope  
606 (Sigma) or the 6xHis-tag (Bethyl Laboratories, Inc.) at 1:10.000 dilution. Anti-rabbit or anti-  
607 mouse IgG horseradish-peroxidase conjugate from donkey (GE Healthcare) was used (at  
608 1:20.000 dilution) for protein visualization in the presence of Western Lightning Plus-ECL  
609 enhanced chemiluminescence substrate (PerkinElmer). The WesternSure® Pre-stained  
610 Chemiluminescent Protein Ladder (Li-cor) was used as a molecular mass standard.

611

### 612 ***Identification of NfrB homologs***

613 NfrB homologs were identified by using the *E. coli* NfrB protein as a query to perform  
614 TBLASTN searches of the NCBI nonredundant protein database. The dataset (dataset\_S1)  
615 was manually curated (Geneious software, Geneious Prime® 2021.2.2) by removing false-  
616 positive hits, as well as disrupted operons (e.g. by mobile genetic elements or mutations in  
617 coding sequences). The tree was generated with phyloT ([phyloT.biobyte.de](http://phyloT.biobyte.de)) by the NCBI  
618 taxonomy of the identified species, in which NfrB homologs were found. iTOL ([itol.embl.de](http://itol.embl.de))  
619 was used to generate the tree. The protein alignment of the 1842 identified homologs was  
620 generated with a Geneious Alignment (Blossum62 cost matrix, gap open penalty of 12, gap  
621 extension penalty of 3 and 2 refinement iterations).

622

### 623 ***Additional software tools***

624 Image J (Schneider 2012) was used to calculate the swim diameters of motility plates and  
625 intensities of images of phosphorimager films of DRaCALA assays. Sequence logos were  
626 generated with the WebLogo service (<https://weblogo.berkeley.edu/>). Prism 9.2.0 (283)  
627 (GraphPad Software, San Diego, California USA) was used for generating graphs and  
628 statistical analysis.

629

630

### 631 **Acknowledgments**

632 We thank Urs Jenal for sharing data prior to publication.

633 This work was supported by the Deutsche Forschungsgemeinschaft (DFG grants He1556/21-  
634 1 and He1556/21-2, as part of DFG Priority Programme 1879 "Nucleotide Second Messenger  
635 Signaling in Bacteria", awarded to RH).

636

### 637 **Author contributions**

638 Concept of the study and design of experiments: EJ, RH; experiments and bioinformatic  
639 analyses: EJ; interpretation of experimental data: EJ, RH; writing of the paper: EJ, RH.

640

#### 641 **Conflict of interest**

642 The authors declare that they do not have any conflict of interest.

643

644

#### 645 **References**

646

- 647 1. Boehm, A., M. Kaiser, H. Li, C. Spangler, C. A. Kasper, M. Ackerman, V. Kaefer, V.  
648 Sourjik, V. Roth, and U. Jenal. 2010. Second messenger-mediated adjustment of  
649 bacterial swimming velocity. *Cell* 141:107-116.
- 650 2. Brombacher, E., C. Dorel, A. J. B. Zehnder, and P. Landini. 2003. The curli  
651 biosynthesis regulator CsgD co-ordinates the expression of both positive and negative  
652 determinants for biofilm formation in *Escherichia coli*. *Microbiology* 149:2847-2857.
- 653 3. Chou, S.-H., and M. Y. Galperin. 2016. Diversity of cyclic di-GMP binding proteins  
654 and mechanisms. *J. Bacteriol.* 198:32-46.
- 655 4. Datsenko, K. A., and B. L. Wanner. 2000. One-step inactivation of chromosomal  
656 genes in *Escherichia coli* K-12 using PCR products. *Proc. Nat. Acad. Sci. USA*  
657 97:6640-6645.
- 658 5. Fang, X., and M. Gomelsky. 2010. A post-translational, c-di-GMP-dependent  
659 mechanism regulating flagellar motility. *Mol. Microbiol.* 76:1295-1305.
- 660 6. Girgis, H. S., Y. Liu, W. S. Ryu, and S. Tavazoie. 2007. A comprehensive genetic  
661 characterization of bacterial motility. *PLoS Genetics* 3:e154.
- 662 7. Hayashi, K., N. Morooka, Y. Yamamoto, K. Fujita, K. Isono, S. Choi, E. Ohtsubo, T.  
663 Baba, B. L. Wanner, H. Mori, and T. Horiuchi. 2006. Highly accurate genome  
664 sequences of *Escherichia coli* K-12 strains MG1655 and W3110. *Mol. Syst. Biol.*  
665 2:2006.0007.
- 666 8. Hengge, R. 2021. High specificity local and global c-di-GMP signaling. *Trends*  
667 *Microbiol.*:(Epub ahead of print, Feb 24).
- 668 9. Hengge, R. 2009. Principles of cyclic-di-GMP signaling. *Nature Rev. Microbiol.*  
669 7:263-273.
- 670 10. Hengge, R. 2016. Trigger phosphodiesterases as a novel class of c-di-GMP effector  
671 proteins. *Phil. Trans. R. Soc. B* 371:20150498.

- 672 11. Hengge, R., M. Y. Galperin, J.-M. Ghigo, L. Gomelsky, J. Green, K. T. Hughes, U.  
673 Jenal, and P. Landini. 2016. Systematic nomenclature for GGDEF and EAL domain-  
674 containing c-di-GMP turnover proteins of *Escherichia coli*. *J. Bacteriol.* 198:7-11.
- 675 12. Jenal, U., A. Reinders, and C. Lori. 2017. Cyclic-di-GMP: second messenger  
676 extraordinaire. *Nat. Rev. Microbiol.* 15:271-284.
- 677 13. Jones, C. J., A. Utada, K. R. Davis, W. Thongsomboon, D. Zamorano Sanchez, V.  
678 Banakar, L. Cegelski, G. C. Wong, and F. H. Yildiz. 2015. C-di-GMP regulates motile  
679 to sessile transition by modulateing MshA pili biogenesis and near-surface motility  
680 behavior in *Vibrio cholerae*. *PLoS Pathog.* 11:e1005068.
- 681 14. Kanegusuku, A. G., I. N. Standovic, P. A. Cote-Hammarlof, P. H. Yong, and C. A.  
682 White-Ziegler. 2021. A shift to human body temperature (37oC) rapidly reprograms  
683 multiple adaptive responses in *Escherichia coli* that would facilitate niche survival and  
684 colonization. *J. Bacteriol.*:(accepted; doi:10.1128/JB00363-21).
- 685 15. Kiino, D. R., R. Licudine, K. Wilt, D. H. Yang, and L. B. Rothman-Denes. 1993. A  
686 cytoplasmic protein, NfrC, is required for bacteriophage N4 adsorption. *J. Bacteriol.*  
687 175:7074-7080.
- 688 16. Kiino, D. R., and L. B. Rothman-Denes. 1989. Genetic analysis of bacteriophage N4  
689 adsorption. *J. Bacteriol.* 171:4595-4602.
- 690 17. Kiino, D. R., M. S. Singer, and L. B. Rothman-Denes. 1993. Two overlapping genes  
691 encoding membrane proteins required for bacteriophage N4 adsorption. *J. Bacteriol.*  
692 175:7081-7085.
- 693 18. Kolmsee, T., and R. Hengge. 2011. Rare codons play a positive role in the expression  
694 of the stationary phase sigma factor RpoS ( $\sigma^S$ ) in *Escherichia coli*. *RNA Biol.* 8:913-  
695 921.
- 696 19. Kutter, E., and A. Sulakvelidze. 2004. Bacteriophages: biology and applications. CRC  
697 Press, Boca Raton (FL, US).
- 698 20. Lairson, L. L., B. Henrissat, G. J. Davies, and S. G. Withers. 2008.  
699 Glycosyltransferases: structures, functions, and mechanisms. *Annu. Rev. Biochem.*  
700 77:521-555.
- 701 21. Lange, R., and R. Hengge-Aronis. 1994. The cellular concentration of the  $\sigma^S$  subunit  
702 of RNA-polymerase in *Escherichia coli* is controlled at the levels of transcription,  
703 translation and protein stability. *Genes Dev.* 8:1600-1612.

- 704 22. Lindenberg, S., G. Klauck, C. Pesavento, E. Klauck, and R. Hengge. 2013. The EAL  
705 domain phosphodiesterase YciR acts as a trigger enzyme in a c-di-GMP signaling  
706 cascade in *E. coli* biofilm control. *EMBO J.* 32:2001-2014.
- 707 23. McPartland, J., and L. B. Rothman-Denes. 2009. The tail sheath of bacteriophage N4  
708 interacts with the *Escherichia coli* receptor. *J. Bacteriol.* 191:525-532.
- 709 24. Meier-Dieter, U., R. Starman, K. Barr, H. Mayer, and P. D. Rick. 1990. Biosynthesis  
710 of enterobacterial common antigen in *Escherichia coli*. Biochemical characterization  
711 of Tn10 insertion mutants defective in enterobacterial common antigen synthesis. *J.*  
712 *Biol. Chem.* 265:13490-13497.
- 713 25. Miller, J. H. 1972. Experiments in molecular genetics. Cold Spring Harbor  
714 Laboratory, Cold Spring Harbor, N. Y.
- 715 26. Moradali, M. F., I. Donati, I. M. Sims, S. Ghods, and B. H. A. Rehm. 2015. Alginate  
716 polymerization and modification are linked in *Pseudomonas aeruginosa*. *mBio*  
717 6:e00453-15.
- 718 27. Morgan, J. L., J. T. McNamara, and J. Zimmer. 2014. Mechanism of activation of  
719 bacterial cellulose synthase by cyclic di-GMP. *Nat. Struct. Mol. Biol.* 21:489-496.
- 720 28. Mutalik, V. K., B. A. Adler, H. S. Rishi, D. Piya, C. Zhong, B. Koskella, E. M. Kutter,  
721 R. Calendar, P. S. Novichkov, M. N. Price, A. M. Deutschbauer, and A. P. Arkin.  
722 2020. High-throughput mapping of the phage resistance landscape in *E. coli*. *PLoS*  
723 *Biol.* 18:e3000877.
- 724 29. Nobrega, F. L., M. Vlot, P. A. de Jonge, L. L. Dreesens, H. J. E. Beaumont, B.  
725 Lavigne, B. E. Dutilh, and S. J. J. Brouns. 2018. Targeting mechanisms of tailed  
726 bacteriophages. *Nat. Rev. Microbiol.* 16:760-773.
- 727 30. Pesavento, C., G. Becker, N. Sommerfeldt, A. Possling, N. Tschowri, A. Mehlis, and  
728 R. Hengge. 2008. Inverse regulatory coordination of motility and curli-mediated  
729 adhesion in *Escherichia coli*. *Genes Dev.* 22:2434-2446.
- 730 31. Pfiffer, V., O. Sarenko, A. Possling, and R. Hengge. 2019. Genetic dissection of  
731 *Escherichia coli*'s master diguanylate cyclase DgcE: role of the N-terminal MASE1  
732 domain and direct signal input from a GTPase partner system. *PLoS Genet.*  
733 15:e1008059.
- 734 32. Powell, B. S., D. L. Court, Y. Nakamura, M. P. Rivas, and C. L. Turnbough Jr. 1994.  
735 Rapid confirmation of single copy lambda prophage integration by PCR. *Nucl. Acids*  
736 *Res.* 22:5765-5766.

- 737 33. Pultz, I. S., M. Christen, H. D. Kulasakara, A. Kennard, B. R. Kulasakara, and S. I.  
738 Miller. 2012. The response threshold of *Salmonella* PilZ domain proteins is  
739 determined by their binding affinities for c-di-GMP. *Mol. Microbiol.* 86:1424-1440.
- 740 34. Rai, A. K., and A. M. Mitchell. 2020. Enterobacterial common antigen: synthesis and  
741 function of an enigmatic molecule. *mBio* 11:e01914-20.
- 742 35. Reinders, A., C.-S. Hee, S. Ozaki, A. Mazur, A. Boehm, T. Schirmer, and U. Jenal.  
743 2016. Expression and genetic activation of cyclic di-GMP-specific phosphodiesterases  
744 in *Escherichia coli*. *J. Bacteriol.* 198:448-462.
- 745 36. Richter, A. M., A. Possling, N. Malysheva, K. P. Yousef, S. Herbst, M. von Kleist,  
746 and R. Hengge. 2020. Local c-di-GMP signaling in the control of synthesis of the *E.*  
747 *coli* biofilm exopolysaccharide pEtN-cellulose. *J. Mol. Biol.* 432:4576-4595.
- 748 37. Roelofs, K. G., C. J. Jones, S. R. Helman, X. Shang, M. W. Orr, J. R. Goodson, M. Y.  
749 Galperin, F. H. Yildiz, and V. T. Lee. 2015. Systematic identification of cyclic-di-  
750 GMP binding proteins in *Vibrio cholerae* reveals a novel class of cyclic-di-GMP-  
751 binding ATPase associated with type II secretion systems. *PLoS Pathog.* 11:e1005232.
- 752 38. Roelofs, K. G., J. Wang, H. O. Sintim, and V. T. Lee. 2011. Differential radial  
753 capillary action of ligand assay for high-throughput detection of protein-metabolite  
754 interactions. *Proc. Natl. Acad. Sci. USA* 108:15528-15533.
- 755 39. Römling, U., M. Y. Galperin, and M. Gomelsky. 2013. Cyclic-di-GMP: the first 25  
756 years of a universal bacterial second messenger. *Microb. Molec. Biol. Rev.* 77:1-52.
- 757 40. Ryjenkov, D. A., R. Simm, U. Römling, and M. Gomelsky. 2006. The PilZ domain is  
758 a receptor for the second messenger c-di-GMP: the PilZ protein YcgR controls  
759 motility in enterobacteria. *J. Biol. Chem.* 281:30310-30314.
- 760 41. Sala, R. F., P. M. Morgan, and M. E. Tanner. 1996. Enzymatic formation and release  
761 of a stable glycal intermediate: the mechanism of the reaction catalyzed by UDP-N-  
762 acetylglucosamine 2-epimerase. *J. Am. Chem. Soc.* 118:3033-3034.
- 763 42. Sarenko, O., G. Klauck, F. M. Wilke, V. Pfiffer, A. M. Richter, S. Herbst, V. Kaefer,  
764 and R. Hengge. 2017. More than enzymes that make and break c-di-GMP - the protein  
765 interaction network of GGDEF/EAL domain proteins of *Escherichia coli*. *mBio*  
766 8:e01639-17.
- 767 43. Sellner, B., R. Prakashaité, M. van Berkum, M. Heinemann, A. Harms, and U. Jenal.  
768 2021. A new sugar for an old phage: A c-di-GMP dependent polysaccharide pathway  
769 sensitizes *E. coli* for bacteriophage infection.(submitted).

- 770 44. Serra, D. O., and R. Hengge. 2019. A c-di-GMP-based switch controls local  
771 heterogeneity of extracellular matrix synthesis which is crucial for integrity and  
772 morphogenesis of *Escherichia coli* macrocolony biofilms. *J. Mol. Biol.* 431:4775-  
773 4793.
- 774 45. Serra, D. O., A. M. Richter, and R. Hengge. 2013. Cellulose as an architectural  
775 element in spatially structured *Escherichia coli* biofilms. *J. Bacteriol.* 195:5540-5554.
- 776 46. Simons, R. W., F. Houman, and N. Kleckner. 1987. Improved single and multicopy  
777 *lac*-based cloning vectors for protein and operon fusions. *Gene* 53:85-96.
- 778 47. Sommerfeldt, N., A. Possling, G. Becker, C. Pesavento, N. Tschowri, and R. Hengge.  
779 2009. Gene expression patterns and differential input into curli fimbriae regulation of  
780 all GGDEF/EAL domain proteins in *Escherichia coli*. *Microbiology* 155:1318-1331.
- 781 48. Studier, F. W., A. H. Rosenberg, J. J. Dunn, and J. W. Dubendorf. 1990. Use of T7  
782 polymerase to direct expression of cloned genes. *Methods Enzymol.* 185:60-89.
- 783 49. Thongsomboon, W., D. O. Serra, A. Possling, C. Hadjineophytou, R. Hengge, and L.  
784 Cegelski. 2018. Phosphoethanolamine cellulose: a naturally produced chemically  
785 modified cellulose. *Science* 359:334-338.
- 786 50. Wang, Y. C., K.-H. Chin, Z. L. Tu, J. He, C. J. Jones, D. Z. Sanchez, F. H. Yildiz, M.  
787 Y. Galperin, and S. H. Chou. 2016. Nucleotide binding by the widespread high-  
788 affinity cyclic di-GMP receptor MshEN domain. *Nat. Commun.* 7:12481.
- 789 51. Weber, H., C. Pesavento, A. Possling, G. Tischendorf, and R. Hengge. 2006. Cyclic-  
790 di-GMP-mediated signaling within the  $\sigma^S$  network of *Escherichia coli*. *Mol.*  
791 *Microbiol.* 62:1014-1034.
- 792 52. Zorraquino, V., B. García, C. Latasa, M. Echeverz, A. Toledo-Arana, J. Valle, I. Lasa,  
793 and C. Solano. 2013. Coordinated cyclic-di-GMP repression of *Salmonella* motility  
794 through YcgR and cellulose. *J. Bacteriol.* 195:417-428.

795

796

## 797 **Figure Legends**

798

799 **FIG 1** The MshEN domain of NfrB specifically binds c-di-GMP. (A) Domain structure of  
800 NfrB (top) and alignment of its glycosyltransferase domain and MshEN domain (bottom).  
801 Residues critical for glycosyltransferase activity (20) and binding of c-di-GMP (50) are  
802 highlighted above the alignment. (B) Organization of the *nfrBA-ybcH* operon in *E. coli* K-12.  
803 The *orf* of *nfrB* is overlapping by 14 nucleotides with the *orf* of *nfrA*. (C) Differential radial



804 capillary action of ligand assay (DRaCALA) of interactions between purified NfrB<sup>414-745</sup> (20  
805  $\mu$ M) incubated with 4 nM [<sup>32</sup>P]-c-di-GMP. Excess (500  $\mu$ M) of unlabeled mono- and  
806 dinucleotides were added to the binding reactions as indicated in competition assays. Protein-  
807 ligand mixtures were spotted onto nitrocellulose and allowed to dry before imaging.  
808 Individual data points (cycles) and averages (bars) of the calculated fraction bound for three  
809 independent experiments are shown. Images of one representative competition assay are  
810 shown below the graph. Binding of [<sup>32</sup>P]-c-di-GMP is noticeable by dark spots centered on  
811 the nitrocellulose. NC, no competitor. *P* values below 0.001 are marked by a (\*) and were  
812 determined by a Student *t* test for significant differences compared with the NC control. (D)  
813 Interaction of NfrB<sup>414-745</sup> with c-di-GMP and GTP was measured by microscale  
814 thermophoresis (MST). 40 nM of labeled NfrB<sup>414-745</sup> (RED-NHS dye, NanoTemper  
815 Technologies) was incubated with increasing concentrations (0.00153  $\mu$ M to 50  $\mu$ M) of c-di-  
816 GMP (n=3) or GTP (n=2) and measured by MST using the Monolith NT.115 (NanoTemper  
817 Technologies) at 20 % Excitation Power and 40 % MST Power. The change in normalized  
818 fluorescence ( $\Delta F_{\text{norm}}$  in [%]) is plotted against the concentration of the respective ligand.  
819 The dissociation constant ( $K_d$ ) was quantified by the  $K_d$  fit of the NanoTemper Analysis  
820 software (v2.3).

821  
822 **FIG 2** The Nfr system is expressed in post-exponentially growing *E. coli* cells in a  
823 temperature-controlled and FliA-activated manner. (A) Expression of the single copy  
824 *nfrB::lacZ* reporter fusion in the *E. coli* K-12 strain W3110 during the growth in liquid LB  
825 medium. OD<sub>578nm</sub> (closed symbols) and specific  $\beta$ -galactosidase activities (open symbols)  
826 were determined during growth at 37°C or 28°C. (B) Expression of the *nfrB::lacZ* reporter  
827 fusion in W3110 derivatives carrying additional mutations in *rpoS*, *flhDC*, *fliA* and *pdeH* was  
828 determined as described above for cells growing in liquid LB medium at 37°C. (C)  
829 Immunoblot analysis of chromosomally encoded C-terminally 3xFLAG-tagged NfrB in a  
830 derivative of strain W3110. Samples were taken at the indicated OD<sub>578</sub> and after growth for  
831 24 h in liquid LB medium at 37°C.

832  
833 **FIG 3** The Nfr system restrains bacterial motility under conditions of elevated intracellular c-  
834 di-GMP levels. Motility phenotypes of strain W3110 (WT) and the indicated mutant  
835 derivatives were analyzed in TB soft-agar plates (0.3% agar) and quantified after 4.5 h  
836 incubation at 37 °C. Representative figures are shown at the bottom of the graphs. The  
837 diameters of the motility swarm were measured and normalized to the WT strain. The bar

838 graphs represent the mean of  $n = 10$  biologically independent samples. Replicates are shown  
839 as individual data points (cycles).

840

841 **FIG 4** Dissecting the role of the Nfr system in the N4 bacteriophage infection. Plaque  
842 formation of phage N4 on *E. coli* K-12 strain W3110 (WT) was tested using serial dilutions  
843 (steps of 1:10 dilutions) of a phage N4 lysate spotted (2  $\mu$ l) on top-agar (LB medium, 1.1 %  
844 agar) containing the respective bacterial strains and incubated at 37°C. (A) Plaque formation  
845 on strain W3110 and derivatives carrying knockout mutations in the indicated genes. (B)  
846 Plaque formation on W3110 (WT) and a derivative strain carrying a deletion removing the  
847 entire *nfrBA-ybcH* operon, both transformed with plasmids encoding the wildtype Nfr system  
848 (NfrBA-YbcH) or derivatives with the indicated mutations in the MshEN domain (L490A,  
849 L490/537A, G491L) or the glycosyltransferase domain (D169A, D267A, W330A) of NfrB.  
850 The empty vector (EV) was used as a control.

851

852 **FIG 5** Specifically DgcJ is required for N4 phage infection and directly interacts with NfrB.  
853 (A) Plaque formation of phage N4 on strain W3110 (WT) and derivatives carrying single  
854 deletion mutations in all 12 genes encoding active DGCs, a double deletion of *dgcJ* and *dgcQ*  
855 or a deletion of the entire *nfrBA-ybcH* operon was assayed as described in Fig. 4. (B) Plaque  
856 formation on a W3110 derivative carrying a deletion in *dgcJ* transformed with a plasmid  
857 encoding DgcJ or DgcJ with an active site mutation in its GGDEF domain (DgcJ<sup>GGAAAF</sup>). The  
858 empty vector (EV) was transformed as a control. (C) NfrB co-purifies with DgcJ. DgcJ<sup>His</sup> was  
859 expressed from the medium copy number vector pRH800 in the presence of NfrB<sup>FLAG</sup>,  
860 expressed from the low-copy number plasmid pAP58. Affinity chromatography was  
861 performed with the indicated cellular extracts on Ni-NTA resin, which specifically binds the  
862 6xHis epitope of DgcJ<sup>His</sup>. In a similar parallel approach, DgcQ<sup>His</sup> was purified in the presence  
863 of NfrB<sup>FLAG</sup>. Empty vectors were used as controls in combinations as indicated. Eluates were  
864 analyzed on SDS polyacrylamide gels, followed by visualization of NfrB (87 kDa), DgcJ (56  
865 kDa) and DgcQ (65 kDa) by immunoblotting using anti-Flag (upper panels) and anti-His6  
866 antibodies (lower panels), respectively.

867

868 **FIG 6** DgcJ, DgcQ and DgcE all contribute to inhibiting motility of a *pdeH* mutant. Motility  
869 phenotypes of strain W3110 (WT) and derivatives carrying the indicated mutations in *pdeH*,  
870 *dgcE*, *dgcJ* and *dgcQ* were analyzed in TB soft-agar plates (0.3% agar) and quantified after  
871 4.5 h incubation at 37 °C. Representative figures are shown at the bottom of the graphs. The

872 diameters of the motility swarms were measured and normalized to the WT strain. The bar  
873 graphs represent the mean of  $n = 10$  biologically independent samples. Replicates are shown  
874 as individual data points (cycles).

875

876 **FIG 7** Genomic context and NfrB homologs in various bacterial species. (A) A phylogenetic  
877 tree based on the NCBI taxonomy of 406 bacterial species encoding NfrB homologs was  
878 generated by phyloT (<http://itol.embl.de/>) and visualized with iTOL (version 6.3.2.). Bacterial  
879 orders are highlighted by the indicated colors. (B) Schematic representations of operons  
880 encoding NfrB homologs and their respective genetic background of representative strains,  
881 whose position in the phylogenetic tree is shown in (A). (C) Sequence Logo of the 1842 NfrB  
882 homologs identified in this study showing the highly conserved active site features of the  
883 glycosyltransferase domains. The numbering is according to the corresponding amino acids in  
884 NfrB of *E. coli* (see Fig. 1A). The Logo was generated with the alignment in Dataset\_S2.

885

886 **FIG 8** Model of the Nfr/DgcJ system and its role in locally c-di-GMP-activated  
887 exopolysaccharide production and bacteriophage N4 adsorption. DgcJ and NfrB co-localize  
888 via a direct protein-protein interaction. The C-terminal MshEN domain of NfrB binds c-di-  
889 GMP specifically produced by DgcJ, leading to an allosteric activation of the N-terminal  
890 glycosyltransferase domain of NfrB. WecB converts UDP-GlcNAc into UDP-ManNAc,  
891 which is used for the biosynthesis of the enterobacterial common antigen (ECA). In addition,  
892 the glycosyltransferase domain of NfrB uses UDP-ManNAc as a substrate to produce a  
893 putative ManNAc-polymer, which is secreted by the outer membrane protein NfrA. YbcH is a  
894 periplasmatic protein, which may play an auxiliary role, but is not essential for polysaccharide  
895 secretion. Phage N4 binds the exopolysaccharide secreted by the Nfr system as an initial  
896 receptor (I.) before interacting with NfrA (II.), which leads to the irreversible adsorption of the  
897 phage.

898

**A**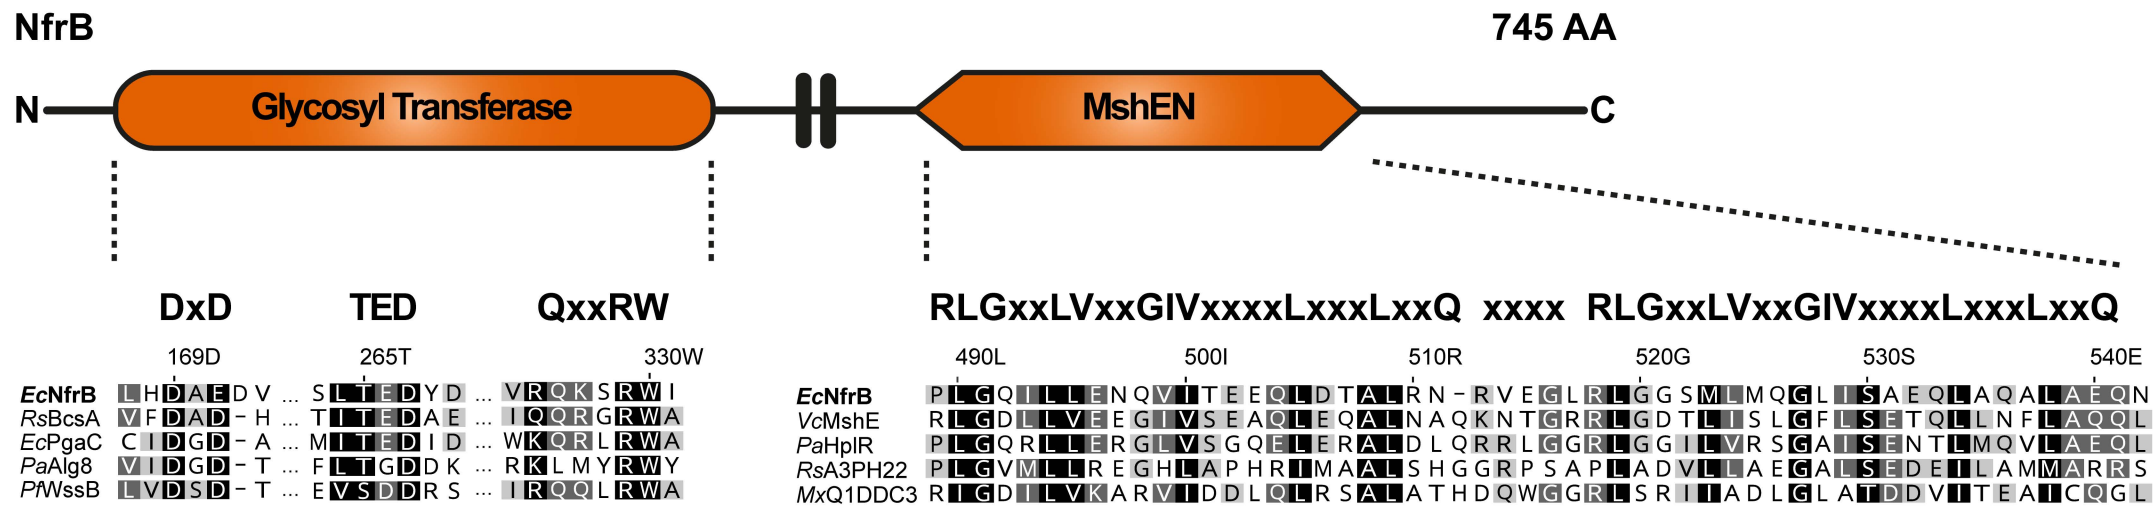**B**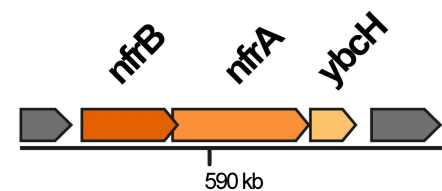

*Escherichia coli* K-12 W3110  
GCA\_000010245.1

**C**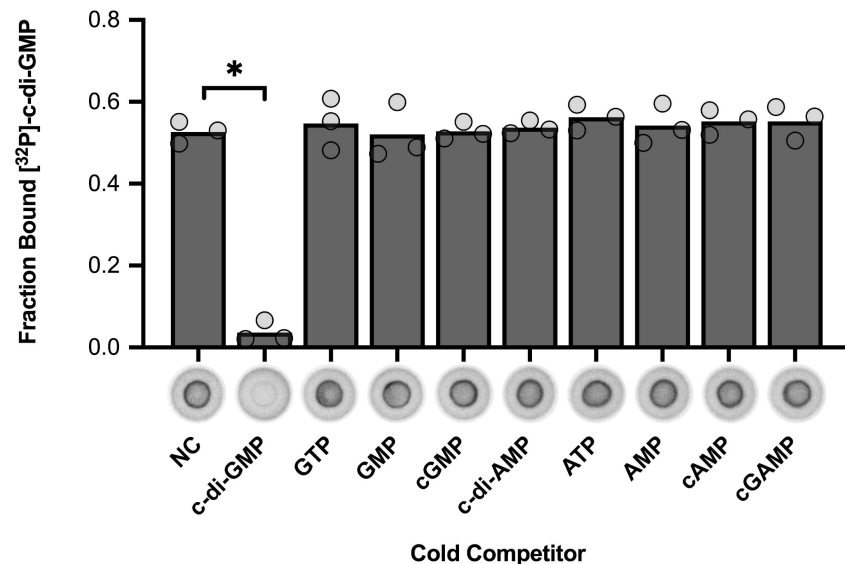**D**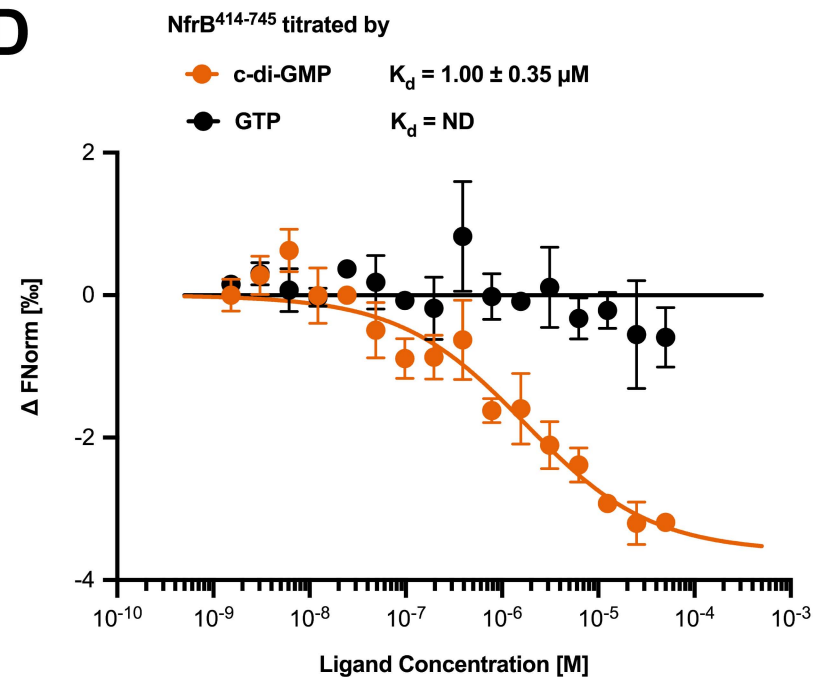

**A**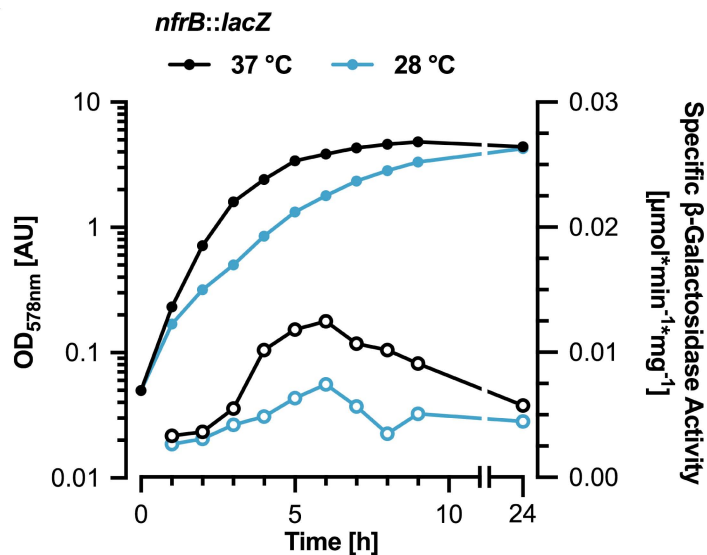**B**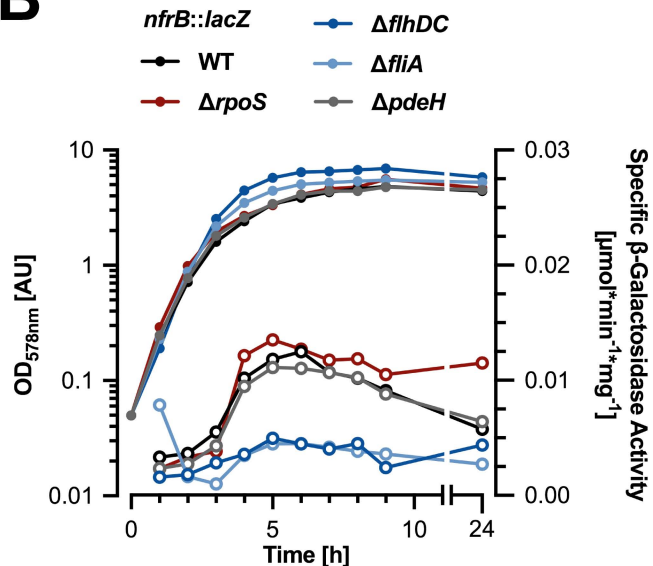**C**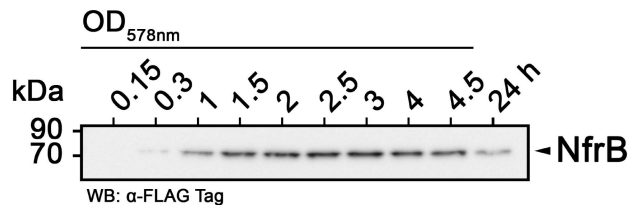

**A**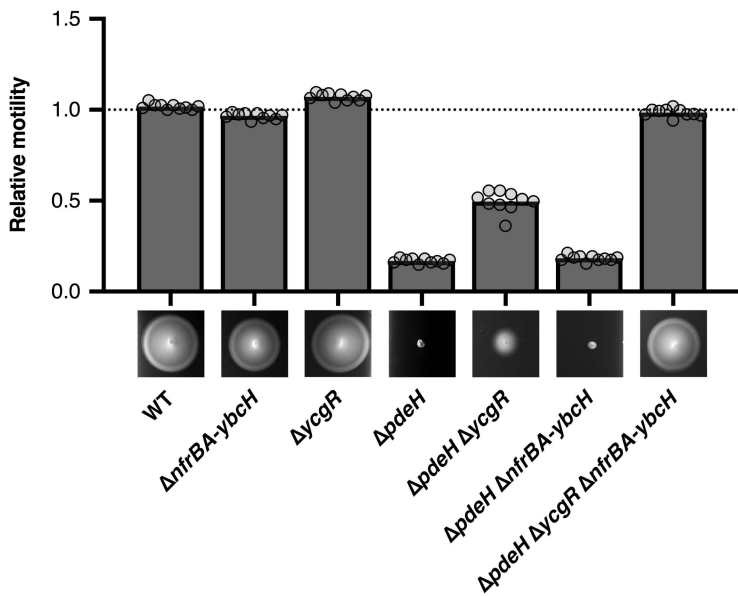**B**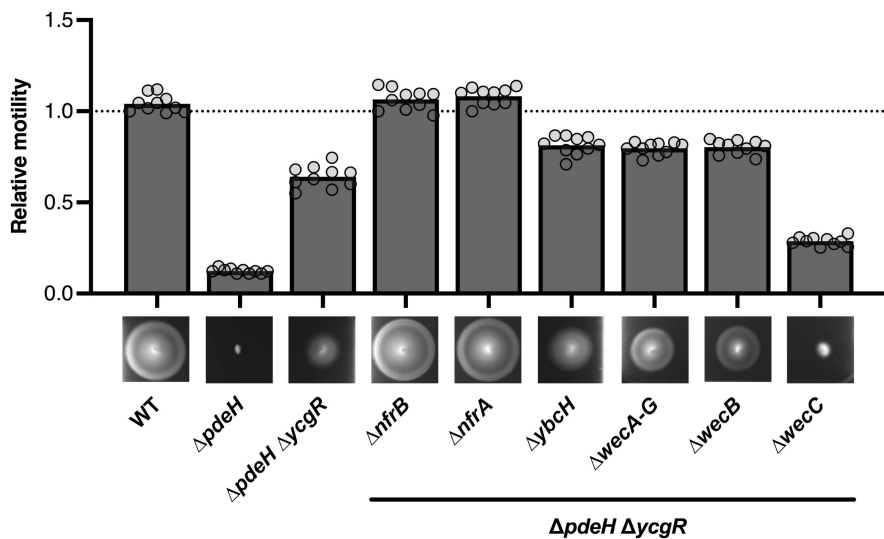

**A**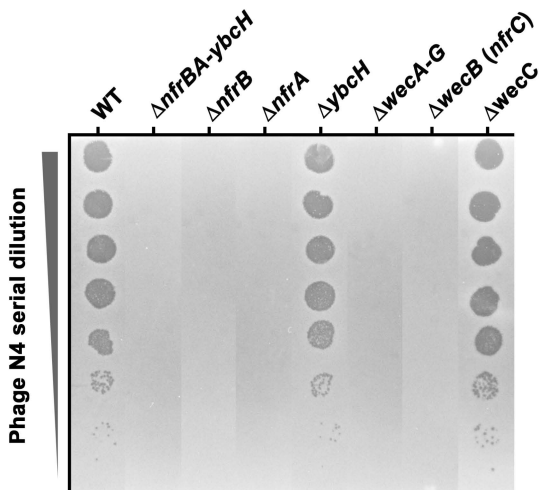**B**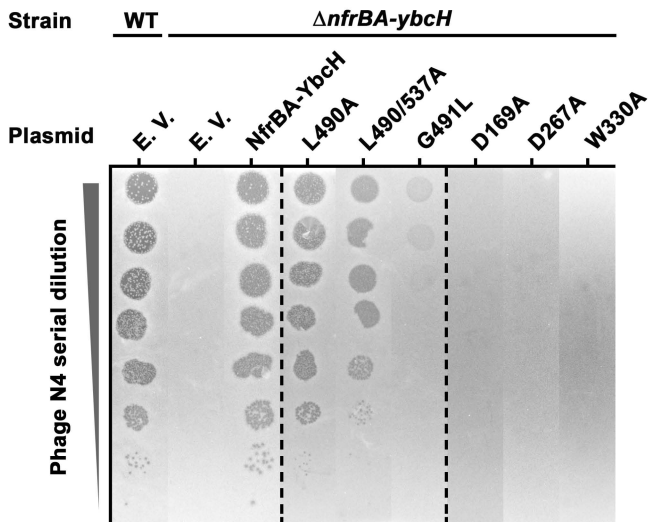

**A**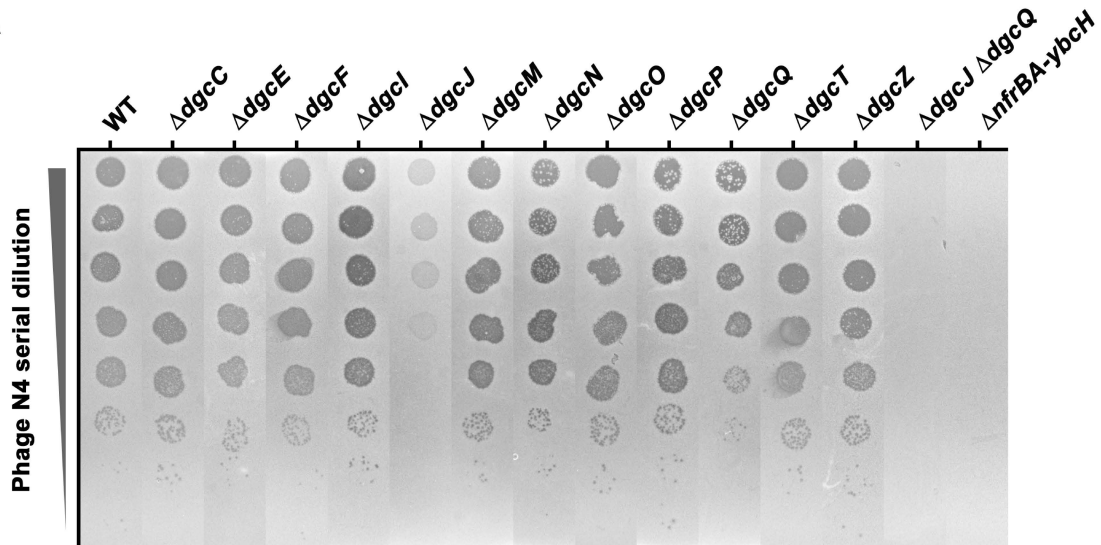**B**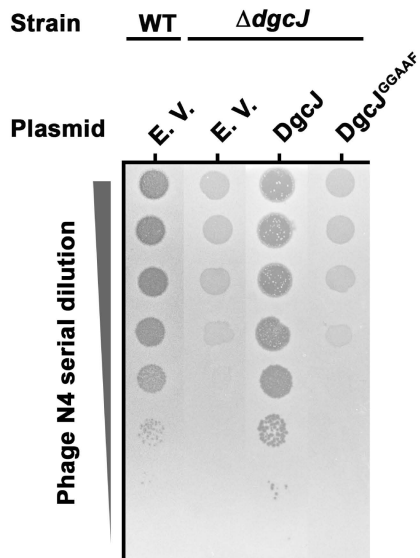**C**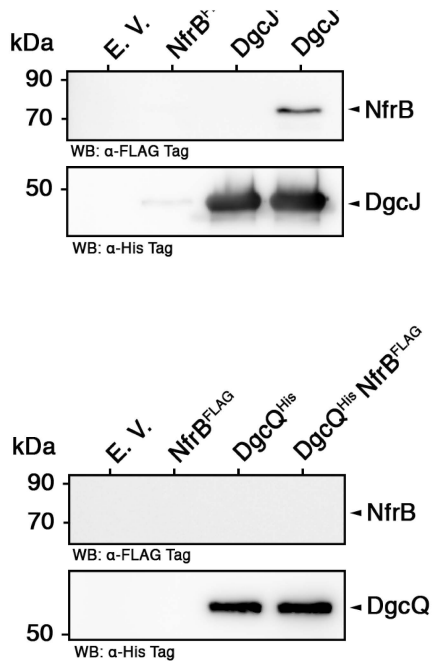



**A**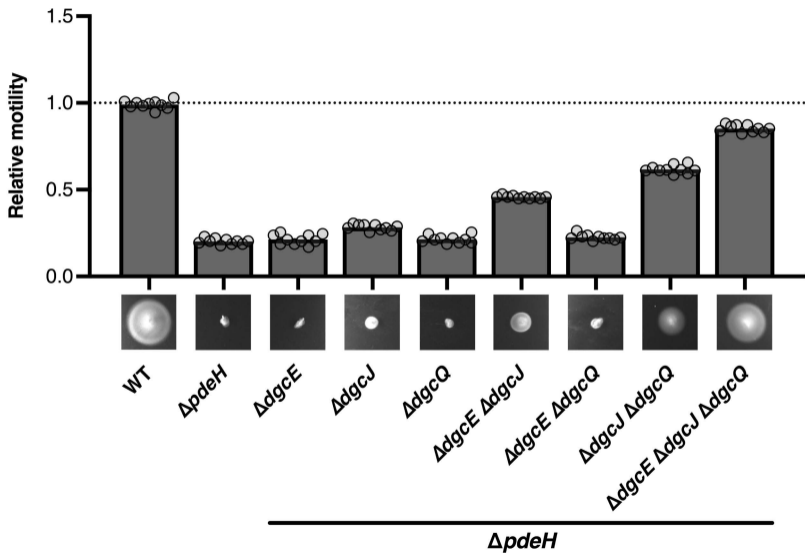

**A**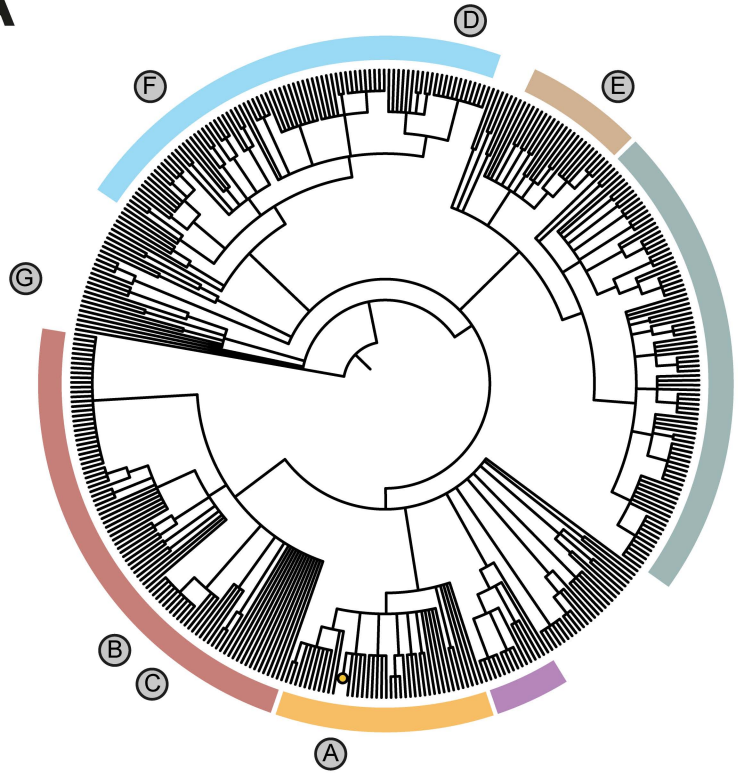

- Enterobacterales
- Pseudomonadales
- Xanthomonadales
- Sphingomonadales
- Hyphomicrobiales
- Burkholderiales

**B**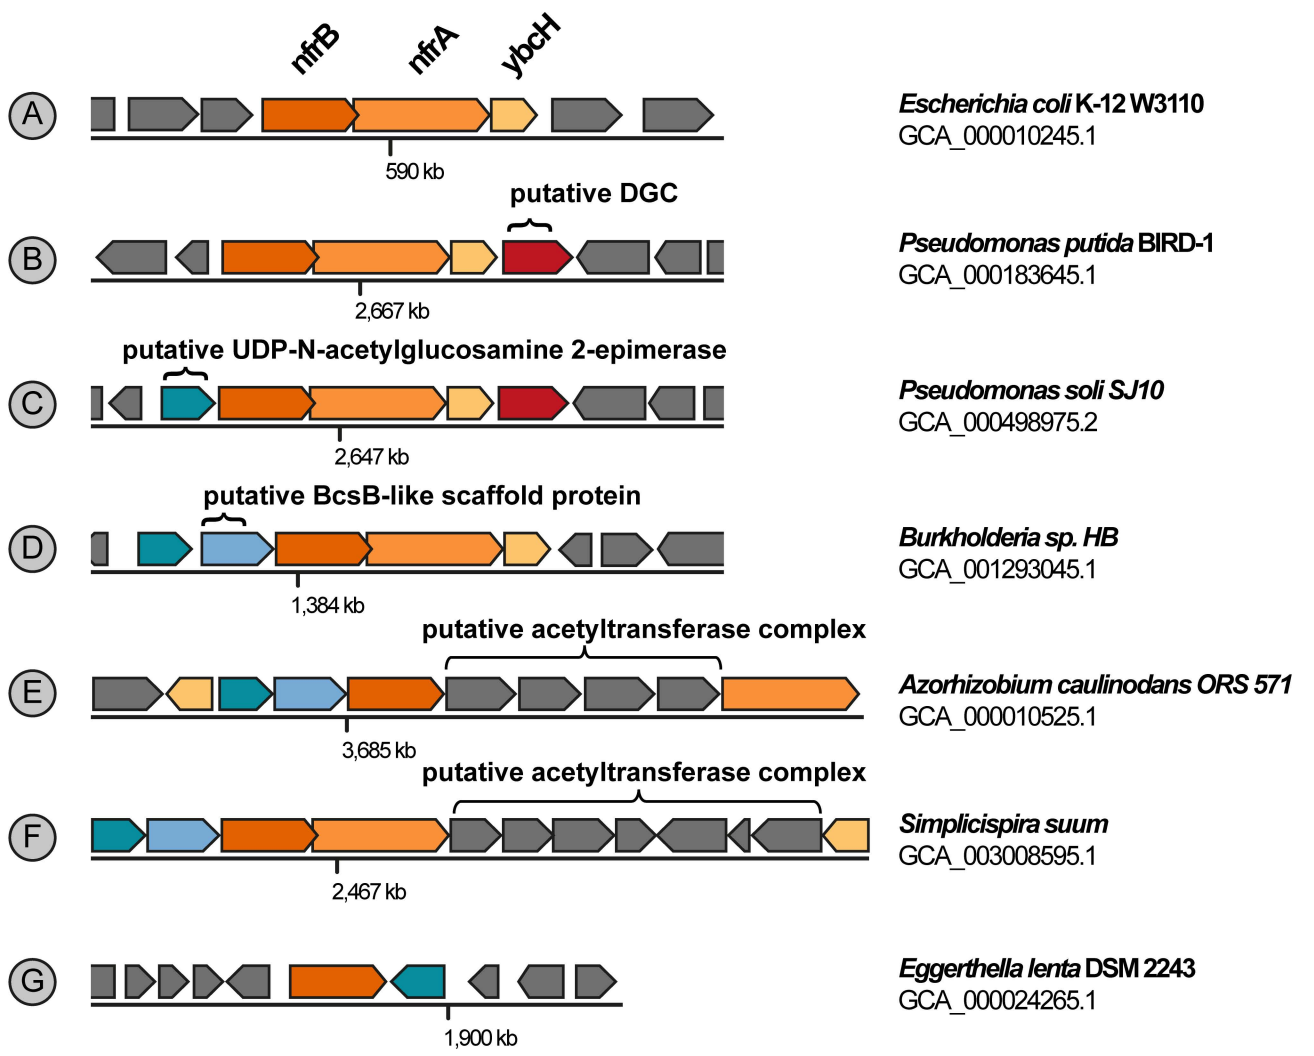**C**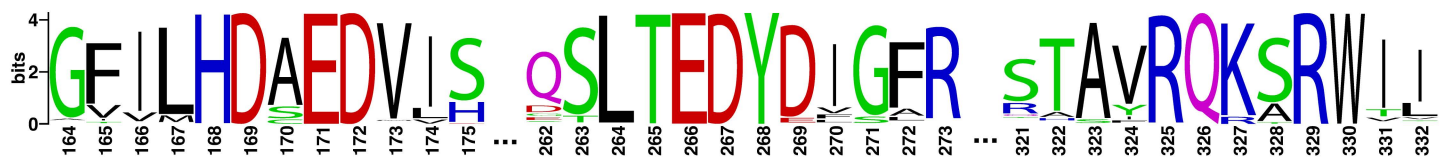

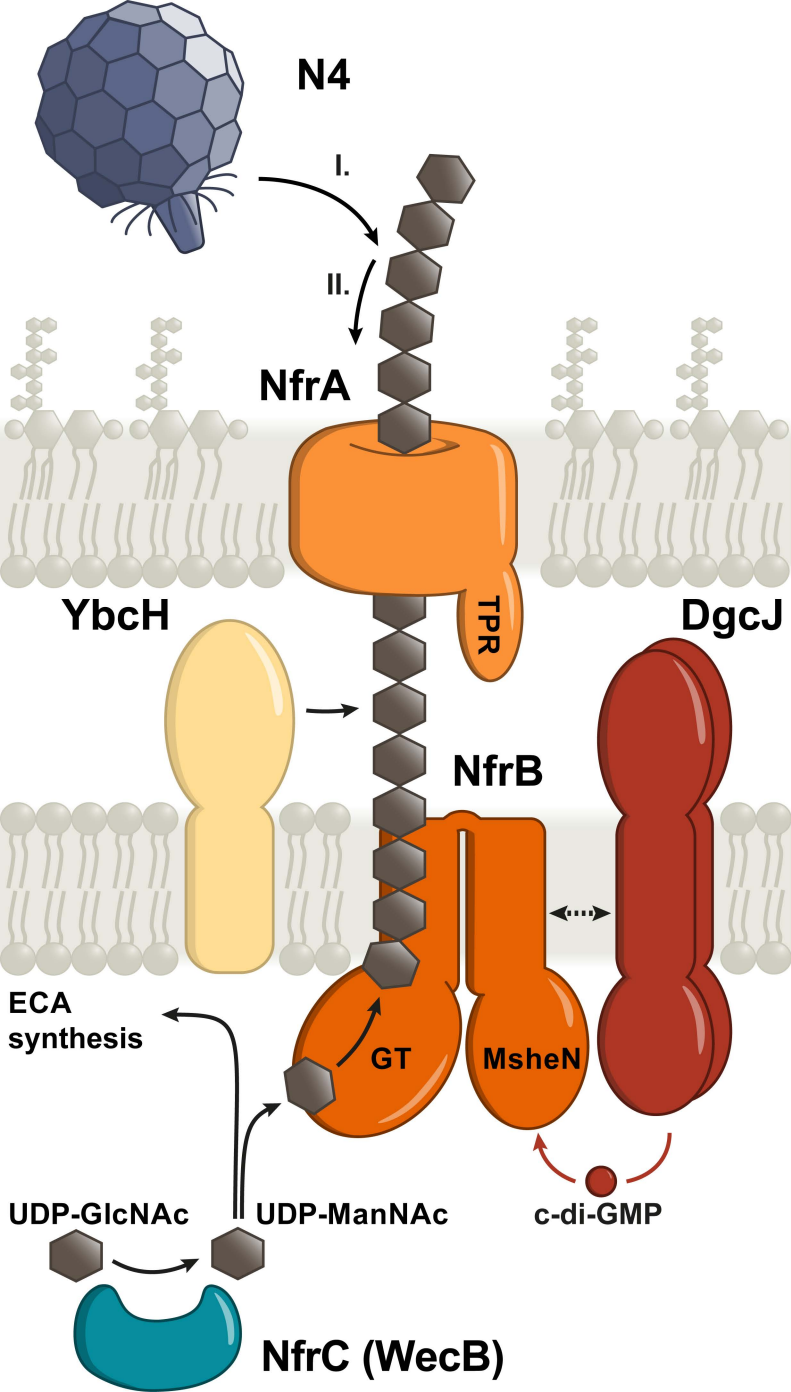

Source: https://www.biorxiv.org/content/10.1101/2021.10.01.462733v1.full.pdf
